1 **Effects of co-incubation of LPS-stimulated RAW 264.7 macrophages on leptin**  
2 **production by 3T3-L1 adipocytes: A method for co-incubating distinct adipose**  
3 **tissue cell lines.**

4

5 **Cristina Caldari-Torres<sup>1\*</sup> and Jordan Beck<sup>1</sup>**

6 <sup>1</sup>Department of Biology, Denison University, Granville, OH, United States of America

7

8 \*Corresponding author

9 E-mail: caldaritorresc@denison.edu

10

## 11 **Abstract**

12           Adipose tissue is a major endocrine organ capable of releasing inflammatory adipokines.  
13 Inflammatory adipokine release is linked to the changes occurring in adipose tissue in the  
14 overfed state, where tissue remodeling results in hypertrophic adipocytes that recruit  
15 monocytes to infiltrate the tissue and take on an inflammatory phenotype. As the proportion  
16 of inflammatory macrophages increases there is a concurrent increase in release of  
17 macrophage-specific inflammatory mediators, further contributing to the inflamed state and  
18 setting an inflammatory loop between the macrophages and adipocytes. Although most  
19 inflammatory adipokines are released by macrophages, adipocytes can also release  
20 immunomodulatory adipokines, such as leptin. The objective of this research was to determine  
21 if co-incubation of activated macrophages with mature adipocytes, using Transwell inserts,  
22 affected leptin release by mature adipocytes. We also examined if there were differences in  
23 the amount of cell-secreted products quantified in cell-conditioned media collected from  
24 macrophage-containing (Transwell insert) and adipocyte-containing (well) compartments.  
25 Mature adipocytes (differentiated 3T3-L1 murine fibroblasts) were co-incubated with control  
26 and lipopolysaccharide-stimulated (0.01  $\mu\text{g/ml}$ ) murine macrophages (RAW264.7), and nitric  
27 oxide, interleukin-6, and leptin levels were quantified in the cell-conditioned media from the  
28 two compartments. Activation status of the macrophages did not affect leptin release by the  
29 adipocytes. We observed higher amounts of leptin in wells compared to Transwells. Nitric  
30 oxide and interleukin-6 levels were similar between Transwells and wells, suggesting that these  
31 adipokines are traveling through the Transwell inserts and reaching equilibrium between the  
32 two compartments. There was a weak negative relationship between nitric oxide release by

33 macrophages and leptin release by adipocytes. Our results suggest that co-incubating activated  
34 macrophages and adipocytes using Transwell inserts can result in distinct microenvironments in  
35 the different cellular compartments and that separate sampling of these compartments is  
36 required to detect the subtle signaling dynamics that exist between these cells.

37

## 38 **Introduction**

39 Adipose tissue (AT) has emerged as a major endocrine organ capable of releasing  
40 inflammatory mediators—adipokines—that may result in a chronic inflammatory state. Low  
41 levels of chronic inflammation, or meta-inflammation, may predispose the individual to chronic  
42 disease, including insulin resistance and type 2 diabetes mellitus (1,2). Adipokines are AT-  
43 derived proteins, a category that includes, but is not limited to, cytokines, chemokines, and  
44 hormones. In addition to adipocytes, AT contains adipocyte precursors in various stages of  
45 differentiation, as well as non-fat cells like endothelial and immune cells. Amongst the immune  
46 cells present in AT, macrophages have received a lot of attention by adipoimmunologists due to  
47 their central role in AT-derived inflammation.

48 Macrophages are innate immune cells that circulate as monocytes and differentiate into  
49 their final phenotype based on the microenvironment encountered in the tissue they  
50 extravasate into for residence. A comprehensive review of adipokine release from AT  
51 concluded that non-fat cells, mostly macrophages, release the majority of the inflammatory  
52 adipokines that are increased in the obese state (3). Some of the adipokines found at higher  
53 circulating levels in obese individuals include interleukin (IL)-6, IL-8, tumor necrosis factor (TNF)-  
54  $\alpha$ , monocyte chemoattractant protein (MCP)-1, and leptin (3). Of these adipokines, leptin is the

55 only one that is primarily produced by the adipocytes (3). Leptin is positively correlated with  
56 obesity and has a major role in regulation of energy homeostasis (4) through its function as a  
57 signal in the feedback loop that controls food intake and body weight (5). Leptin also has  
58 effects on both the innate and adaptive branches of the immune system. With regards to  
59 monocytes/macrophages, which express the functional leptin receptor (6, 7), this adipokine has  
60 been implicated in modulation of cytokine production (7), phagocytosis (8), and differentiation  
61 of monocytes into pro-inflammatory M1 macrophages (9, 10). Unno et al. (11) reported that  
62 nitric oxide (NO), a signaling molecule that is readily produced by activated macrophages,  
63 downregulated leptin expression at both the protein and mRNA level in murine adipocytes  
64 (3T3-L1 cell line). The NO used in the study was derived from various NO donors (NOC7,  
65 NOC18, and GSNO) and autocrinally from the adipocytes. There are currently no reports on the  
66 effects of macrophage-derived adipokines, including NO, on leptin production by adipocytes.

67 The inflamed microenvironment caused by AT-derived adipokines in the obese state  
68 drives immune cell recruitment (3, 12, 13), increasing the percentage of macrophages residing  
69 in obese compared to lean AT. In lean AT, macrophages make up ~10% of cells (14) and mostly  
70 exhibit the alternatively activated (M2) anti-inflammatory phenotype. M2 macrophages have  
71 housekeeping functions ranging from immune surveillance to clearance of cellular debris and  
72 lipid buffering (15). In obese AT there is an increase in total macrophage numbers (making up  
73 to 50-60% of AT) as well as in the number of macrophages exhibiting a classically activated or  
74 M1, pro-inflammatory phenotype (14, 16). Pro-inflammatory M1 macrophages express higher  
75 levels of TNF- $\alpha$  and inducible nitric oxide synthase (iNOS) (16). Using DNA microarray gene  
76 analyses, Yamashita et al. (17) concluded that low levels (1 ng/ml) of bacterial

77 lipopolysaccharide (LPS) drive RAW264.7 murine macrophages to differentiate into M1  
78 macrophages, increasing expression of cyclooxygenase-2, iNOS, TNF- $\alpha$ , and activation of NF- $\kappa$ B.  
79 Factors that increase monocyte recruitment to obese AT and their differentiation into the M1  
80 macrophage phenotype include hypertrophy of adipocytes (18), the aforementioned release of  
81 inflammatory adipokines and chemokines by AT (19, 20), and increased presence of  
82 hypoxic/apoptotic adipocytes (21). Adipocyte survival and maturation/differentiation is  
83 affected by increases in M1 macrophage numbers in AT, resulting in a decrease in adipocyte  
84 hyperplasia--the production of new adipocytes--during times of chronic positive energy  
85 balance, and instead favoring hypertrophy of already existing adipocytes (2). Hypertrophic  
86 adipocytes are associated with augmented inflammation and dysfunctional insulin sensitivity  
87 (22). Inflammatory adipokines released by M1 macrophages, like TNF- $\alpha$  and IL-6, can block  
88 insulin action in adipocytes via autocrine/paracrine mechanisms (12), linking the increased  
89 macrophage recruitment and M1 polarization observed in obese AT with impaired insulin  
90 sensitivity. These inflammatory adipokines also result in adipocyte mitochondrial  
91 dysregulation, through an increased release of reactive oxygen species and mitochondrial  
92 fragmentation, adding a further layer of complexity to the adipocyte-macrophage crosstalk and  
93 potentiation of inflammation in obese adipose tissue (23).

94         In review, increased energy storage associated with obesity causes hypertrophic,  
95 hypoxic, and apoptotic adipocytes that release increasing amounts of inflammatory adipokines.  
96 The inflamed microenvironment favors recruitment of macrophages toward obese AT and  
97 polarizes them toward the M1 inflammatory phenotype which, in turn, release macrophage-  
98 specific inflammatory adipokines that further support adipocyte hypertrophy and recruitment

99 of monocytes from circulation, creating an inflammatory loop. The cross-talk between  
100 macrophages and adipocytes and their precursors is central to the investigation of AT-derived  
101 inflammation, as it maintains the inflammatory loop and aids in the recruitment of new  
102 macrophages that will likely develop an M1 phenotype (13).

103 The main objective of this research was to determine the effects of co-incubating  
104 murine 3T3-L1 adipocytes and activated RAW264.7 macrophages on the production of two  
105 inflammatory adipokines--IL-6 and leptin—by these two cells types. Specifically, we wanted to  
106 test if activation status of the macrophages would exert paracrine effects on the mature  
107 adipocytes, as measured by secretion of leptin, an adipocyte-specific adipokine. These  
108 objectives were tested through the use of Transwell inserts (0.4  $\mu\text{m}$  pore size), which allow for  
109 the co-incubation of different cell lines and exposure of one cell line to products secreted by  
110 the other cell line. We also examined if there was a difference in the amount of cell-secreted  
111 products quantified in the cell-conditioned media collected from macrophage-containing  
112 Transwells and adipocyte-containing wells. Sampling each cell types' microenvironment would  
113 allow us to detect the potential subtle signaling dynamics that exist between these cells.

114

## 115 **Materials and Methods**

### 116 **Reagents and materials**

117 Murine fibroblast (3T3-L1, cat no. CL-173) and macrophage (RAW 264.7, cat no. TIB-71)  
118 immortalized cell lines were purchased from ATCC (Manassass, VA). Dulbecco's modified  
119 Eagle's medium (DMEM), phosphate buffered saline (PBS), fetal bovine serum (FBS), penicillin-  
120 streptomycin, and polystyrene 6-well plates were purchased from Fisher Scientific (Pittsburg,

121 PA). The IL-6 and leptin enzyme-linked immunosorbent assay (ELISA) was purchased from R&D  
122 systems (Minneapolis, MN), while the Griess assay for nitric oxide (NO) quantification was  
123 obtained from Promega (Madison, WI). Trypan blue, insulin, dexamethasone (DEX), d-biotin, 3-  
124 isobutyl-1-methylxanthine (IBMX), Trypsin-EDTA 0.25%, and lipopolysaccharide (LPS) were  
125 purchased from Sigma-Aldrich (St Louis, MO). Transwell permeable supports (0.4  $\mu\text{m}$  pore size,  
126 12mm diameter, polyester membrane) and 12-well plates (polystyrene) were obtained from  
127 Corning Costar (Corning, NY).

128

### 129 **3T3-L1 cell maintenance, culture, and differentiation into mature adipocytes**

130 The 3T3-L1 cell line must be differentiated from a fibroblast phenotype into its final,  
131 mature adipocyte phenotype containing lipid droplets. To do this, cells were incubated in 12-  
132 well plates, in a 5% CO<sub>2</sub> humidified atmosphere, and were kept in the undifferentiated  
133 fibroblast phenotype at less than 50% confluency during sub-culturing. Detachment of cell  
134 monolayer for sub-culturing was performed via trypsinization. Growth medium for 3T3-L1 cells  
135 consisted of DMEM, 10% (v/v) heat-inactivated FBS, 1% antibiotics (100 U/ml penicillin and 100  
136  $\mu\text{g}/\text{ml}$  streptomycin), and 0.008  $\mu\text{g}/\text{ml}$  D-biotin. Differentiation into the adipocyte phenotype  
137 was performed as described by Zebisch *et al.* (24). Briefly, three days after cells reached ~90%  
138 confluency and started to clump together and lose fibroblast morphology, they were washed  
139 with 1X PBS and treated with a differentiation cocktail consisting of growth medium  
140 supplemented with 0.05  $\mu\text{M}$  IBMX, 1  $\mu\text{M}$  DEX, and 20  $\mu\text{g}/\text{ml}$  insulin. Forty-eight hours after  
141 addition of the differentiation cocktail, the cells were washed with 1X PBS and treated with  
142 post-differentiation medium consisting of growth medium supplemented with 20  $\mu\text{g}/\text{ml}$  insulin.

143 Treatment with post-differentiation medium was performed every forty-eight hours for a total  
144 of four times. At the end of the differentiation period lipid droplets inside the adipocytes could  
145 be visualized using an inverted microscope.

146

#### 147 **RAW 264.7 cell maintenance and culture**

148 RAW 264.7 cells were grown in polystyrene 6-well plates with DMEM supplemented  
149 with 10% (v/v) heat-inactivated FBS and 1% antibiotics (100 U/ml penicillin and 100 µg/ml  
150 streptomycin). Cells were incubated in a 95% O<sub>2</sub> and 5% CO<sub>2</sub> humidified atmosphere. During  
151 initial expansion, the medium was changed every two days after washing cells with 1X PBS.  
152 Cells were not grown beyond 80% confluency during expansion. Detachment of cell monolayer  
153 for sub-culturing was performed with the cell scraping method. When cells reached 80%  
154 confluency, they were transferred to Transwell inserts to commence the co-incubation  
155 experiments.

156

#### 157 **RAW 264.7 cell activation**

158 A concentration of 0.01 µg/ml of LPS was used and three methods of LPS challenge for  
159 co-incubation experiments were tested: macrophages in 6-well plate were washed,  
160 resuspended (via scraping) in fresh medium, transferred to Transwell inserts and challenged  
161 with LPS that was added into the Transwell compartment (3T3+RAW+LPS); macrophages were  
162 challenged with LPS for 24 h while in well of 6-well plate, were then washed, resuspended (via  
163 scraping) in fresh medium, and transferred to Transwell insert (3T3+StimRAW); and  
164 macrophages were challenged with LPS for 24 h while in well of 6-well plate and then



165 resuspended (via scraping) and transferred to Transwell insert along with the conditioned  
166 media (3T3+StimRAW+CondMed). Non-LPS-challenged macrophages were co-incubated with  
167 adipocytes as a control (3T3+RAW).

168

### 169 **Quantification of Nitric Oxide (NO) Production**

170 Macrophage activation was quantified via measurement of NO levels. Nitric oxide  
171 production by the macrophages was determined through quantifying nitrite levels in cell-  
172 conditioned media using the Griess assay. Briefly, 50  $\mu$ L of cell conditioned media were added  
173 in triplicate to a 96-well plate and mixed with 50  $\mu$ L of sulfanilamide solution and allowed to  
174 incubate for 10 min. Following the incubation, 50  $\mu$ L of N-1-naphthylethylenediamine (NED)  
175 were added to each well, followed by a 10 min incubation. After the second incubation,  
176 absorbance was measured at 530 nm. Nitrite concentrations were determined by extrapolating  
177 absorbance measurements from a 0-100  $\mu$ M standard curve. An Epoch plate reader (BioTek  
178 Instruments, Winooski, VT) was used for absorbance measurements.

179

### 180 **Co-incubation of RAW 264.7 and 3T3-L1 cells using Transwell Inserts**

181 Several co-incubation methodologies were tested to determine if they resulted in  
182 different activation level of the macrophages, as measured by NO and IL-6 levels in cell-  
183 conditioned medium. Additionally, leptin levels in cell-conditioned medium were measured to  
184 test if activation state of the macrophages affected production of this adipokine by the mature  
185 adipocytes. Three methods of macrophage stimulation/co-incubation were tested. Mature  
186 adipocytes (differentiated according to the steps described in section 2.2) in 12-well plates

187 were co-incubated with macrophages stimulated with LPS as described in the section 2.4: 1.  
188 3T3+RAW+LPS, 2. 3T3+StimRAW, and 3. 3T3+StimRAW+CondMed. Additionally, adipocytes  
189 were co-incubated with unstimulated RAW264.7 cells resuspended in fresh medium (3T3+RAW)  
190 as a control. On average,  $8.0 \times 10^5$  macrophages were plated onto each Transwell insert in a  
191 total of 500  $\mu$ l. Twenty-four hours after co-incubation commenced, media was collected  
192 separately from the Transwell inserts and wells, transferred to 1.5 ml microcentrifuge tubes,  
193 and stored at  $-20^{\circ}\text{C}$  until used for IL-6, leptin, and NO quantification. Wells were run in  
194 duplicate and experiments were performed four times.

195

#### 196 **Quantification of Adipokine Production**

197 Analyses of cell conditioned media for determination of adipokine levels were done  
198 using IL-6 and leptin sandwich ELISAs according to manufacturer's instructions. Samples were  
199 tested in triplicate, and a standard curve was produced and used to extrapolate the cytokine  
200 concentrations in the samples. Samples measuring  $> 500$  pg/ml (highest standard) were diluted,  
201 re-quantified, and results were adjusted taking the dilution factor into account. An Epoch plate  
202 reader was used for absorbance measurements.

203

#### 204 **Statistical analyses**

205 Statistical analyses were done using JMP Pro 13 (Cary, NC). Non-normal data were  
206 normalized using a log transformation. Matched paired t-tests were used to determine  
207 differences in NO, IL-6, and leptin levels between cell-conditioned medium collected from  
208 Transwell inserts containing macrophages and wells containing adipocytes. In order to

209 determine differences in NO, IL-6, and leptin produced by control and LPS-challenged cells,  
210 Student's t-tests were used. Linear regression analyses were used to test relationships  
211 between IL-6, NO, and leptin. Interleukin-6, leptin, and NO concentrations in cell conditioned  
212 media were analyzed using the general mixed linear model. All statistical analyses were  
213 conducted using JMP Pro 15 (SAS, Cary, North Carolina). The sources of variation included  
214 experiment, treatment, experiment x treatment interaction, and well nested within experiment  
215 x treatment interaction. The experiment, treatment x experiment interaction, and well nested  
216 within experiment x treatment interaction were considered as random variables. When  
217 treatment effects were detected, means were separated using Tukey's HSD. The level of  
218 significance was defined at  $p < 0.05$ . Experimental results are expressed as mean  $\pm$  SE.

219

## 220 **Results**

### 221 **Differential effects of LPS on NO, IL-6, and leptin production in murine macrophage and** 222 **adipocytes**

223 In order to determine the effect of an LPS challenge on macrophage activation (as  
224 measured by NO production), IL-6, and leptin production by murine macrophages and  
225 adipocytes, a series of control experiments were performed on the isolated cell lines. The RAW  
226 264.7 macrophages were grown to 80-85% confluence, while 3T3-L1 cells were differentiated  
227 into the mature adipocyte phenotype, at which time LPS was added (0.01  $\mu$ g/ml) and allowed  
228 to incubate for a period of 6 hours. Lipopolysaccharide challenge resulted in an increase in  
229 macrophage activation, as measured by increased NO production (Figure 1a; student's t-test,  $p$   
230  $< 0.0001$ ), and IL-6 production (Figure 1b; student's t-test,  $p < 0.0001$ ), and increased IL-6

231 production by mature adipocytes (Figure 1b; t-test,  $p=0.001$ ). Nitric oxide production by  
232 mature adipocytes was negligible and did not differ between control and LPS-challenged cells  
233 (Figure 1a; student's t-test,  $p = 0.58$ ), while murine macrophages did not produce quantifiable  
234 amounts of leptin in either the control or LPS-challenged conditions (Figure 1c). Adipocytes  
235 produced similar amounts of leptin in either the absence or presence of LPS ( $965.8 \pm 648.2$  vs  
236  $741.5 \pm 413.2$  pg/ml) (Figure 1c; student's t-test,  $p = 0.43$ ).

237  
238 **Fig 1. Nitric oxide (NO;  $\mu$ M, panel a), interleukin-6 (IL-6; pg/ml, panel b), and leptin (pg/ml,**  
239 **panel c) production by control and LPS-stimulated murine macrophages (RAW264.7) and**  
240 **adipocytes (3T3-L1).** Adipokine concentrations in control and LPS-stimulated cells were  
241 compared using a Student's t-test. Data represent least squares means  $\pm$  SEM of 4 independent  
242 experiments. There was no quantifiable leptin production by RAW 264.7 cells. Significant  
243 treatment differences are represented with an asterisk (\*) ( $p<0.05$ ).

244  
245 **Differences in amounts of molecules quantified between Transwell inserts and wells**

246 Although the pores of the Transwell insert membrane are large enough ( $0.4 \mu\text{m}$ ) to  
247 allow the diffusion of molecules of varying sizes from areas of higher to lower concentration,  
248 we considered that at the time of sampling equilibrium might not have been reached, resulting  
249 in differences in microenvironment between the Transwell inserts and the wells. At the end of  
250 the co-incubation experiments we sampled cell-conditioned media from these two  
251 compartments and measured NO, IL-6, and leptin levels in them separately (Table 1). Higher  
252 amounts of the leptin adipokine were observed in adipocyte-containing wells ( $627.1 \pm 47.5$

253 pg/ml) compared to macrophage-containing Transwell inserts ( $478.2 \pm 47.5$  pg/ml) (Table 1;  
254 matched pairs t-test,  $p = 0.004$ ). These findings are unsurprising as leptin is mostly, if not  
255 exclusively, produced by adipocytes, which were localized in the well compartment. The  
256 difference in leptin levels in wells and Transwells indicates that if leptin is traveling across the  
257 Transwell insert membrane, at the time of sampling levels of the molecule had not reached  
258 equilibrium. There were no significant differences in the amounts of NO and IL-6 quantified in  
259 the macrophage-containing Transwell inserts compared to the adipocyte-containing wells  
260 (Table 1). The low levels of NO and IL-6 produced by control and LPS-challenged adipocytes  
261 (Figures 1a and 1b) suggest that these molecules are produced by macrophages and traveling  
262 across the Transwell membrane into the well compartment.

263

264

265 Table 1. Differences in NO, IL-6, and leptin amounts quantified between macrophage-  
266 containing Transwell inserts and adipocyte-containing wells (across treatments). Matched Pairs  
267 t-tests with  $p < 0.05$  indicate significant difference in amount of molecule measured in  
268 Transwells and wells.

| Molecule             | Average amount of molecule in Transwell (Macrophages) | Average amount of molecule in Well (Adipocytes) | Difference between Transwell and Well (Matched Pairs t-test) |
|----------------------|-------------------------------------------------------|-------------------------------------------------|--------------------------------------------------------------|
| NO ( $\mu\text{M}$ ) | $7.2 \pm 1.0$                                         | $6.0 \pm 1.0$                                   | $p=0.26$                                                     |
| IL-6 (pg/ml)         | $1172.2 \pm 122.0$                                    | $1115.76 \pm 122.0$                             | $p=0.65$                                                     |
| Leptin (pg/ml)       | $478.2 \pm 47.5$                                      | $627.1 \pm 47.5$                                | $p=0.004^*$                                                  |

269

## 270 **Effect of macrophage activation status on NO, IL-6, and leptin levels**

271 We were interested in testing if different methods of macrophages activation resulted  
272 in quantifiable differences in NO and IL-6 production. Specifically, we challenged macrophages  
273 with LPS (6 h) at time of co-incubation with adipocytes (3T3+RAW+LPS) or challenged them  
274 with LPS for 6 h before co-incubation with adipocytes and then either co-incubated the  
275 adipocytes with the previously LPS-challenged macrophages resuspended in fresh media  
276 (3T3+StimRAW) or in their conditioned media (3T3+stimRAW+CondMed).

277 As expected, the co-incubation methodologies with LPS-challenged macrophages  
278 (3T3+RAW+LPS,) resulted in higher NO (Figures 2b) and IL-6 (Figures 3b and 3c) production  
279 compared to the control with unstimulated macrophages (3T3+RAW) (general mixed linear  
280 model,  $p < 0.0001$ ). When measuring adipokine levels in cell-conditioned media from Transwell  
281 inserts, we observed no differences in levels of molecules that indicate macrophage activation

282 (NO, IL-6) among the three co-incubation methodologies containing LPS-challenged  
283 macrophages, regardless of if the cells were activated before or during plating onto the  
284 Transwell inserts, or if fresh or conditioned media was used (Figures 2b, 2c, 3b and 3c; general  
285 mixed linear model,  $p < 0.001$ ). Interestingly, in the well compartment there were no differences  
286 in NO levels among control and the LPS-challenged macrophage treatments (Figure 2c; general  
287 mixed linear model,  $p = 0.05$ ), while IL-6 levels were significantly higher in those treatments  
288 containing activated macrophages (Figure 3c; general mixed linear model,  $p < 0.0001$ ).

289

290 **Fig 2. Mean nitric oxide (NO;  $\mu\text{M}$ ) production across treatments in Transwells and wells**  
291 **(panel a) and for different co-incubation methods of 3T3-L1+RAW cells (Transwells=panel b;**  
292 **wells=panel c).** NO levels in macrophage-containing Transwell inserts vs adipocyte-containing  
293 wells did not differ (matched-pairs t-test,  $p = 0.26$ ; panel a). NO concentrations for the various  
294 co-incubation methods (“treatment”) were compared using a general mixed linear model,  
295 followed by post-hoc Tukey-Kramer HSD. Data represent least squares means  $\pm$  SEM of 4  
296 independent experiments. Significant treatment differences are represented with different  
297 letters ( $p < 0.05$ ).

298

299 **Fig 3. Mean interleukin-6 (IL-6;  $\text{pg/ml}$ ) production across treatments in Transwells and wells**  
300 **(panel a) and for different co-incubation methods of 3T3-L1+RAW cells (Transwells=panel b;**  
301 **wells=panel c).** IL-6 levels in macrophage-containing Transwell inserts vs adipocyte-containing  
302 wells did not differ (matched-pairs t-test,  $p = 0.65$ ; panel a). IL-6 concentrations for the various  
303 co-incubation methods (“treatment”) were compared using a general mixed linear model,

304 followed by post-hoc Tukey-Kramer HSD. Data represent least squares means  $\pm$  SEM of 4  
305 independent experiments. Significant treatment differences are represented with different  
306 letters ( $p < 0.05$ ).

307

308 Higher amounts of the leptin adipokine were observed in adipocyte-containing wells  
309 compared to macrophage-containing Transwells (Fig 1a) but macrophage activation status did  
310 not have an effect on leptin levels in either the macrophage-containing Transwell inserts (Figure  
311 4b) or adipocyte-containing wells (Figure 4c).

312

313 **Fig 4. Mean leptin (pg/ml) production in Transwells and wells (panel a) and for different co-**  
314 **incubation methods of 3T3-L1+RAW cells (panels b and c).** Leptin levels in macrophage-  
315 containing Transwell inserts were lower than for adipocyte-containing wells (matched-pairs t-  
316 test,  $p = 0.004$ ; panel a). Leptin concentrations for the various co-incubation methods  
317 (“treatment”) were compared using a general mixed linear model, followed by post-hoc Tukey-  
318 Kramer HSD. Data represent least squares means  $\pm$  SEM of 4 independent experiments. There  
319 were no treatment effects on leptin levels in Transwell inserts or wells.

320

#### 321 **Relationships between molecules**

322 In Transwell inserts a trend for a negative linear relationship between levels of NO and  
323 leptin was observed (Figure 5a; linear regression,  $p = 0.09$ ), while a significant negative linear  
324 relationship between levels of NO and leptin was present in wells (Figure 5c; linear regression,  
325  $p = 0.03$ ). There was no relationship between leptin and IL-6 levels in either wells or Transwell



326 inserts (Figures 5b and 5d). It is important to highlight that the low coefficients of  
327 determinations ( $R^2$ ) for the relationships between NO and leptin indicate that there are high  
328 levels of variability in leptin levels that cannot be explained by NO levels.

329  
330 **Fig 5. Relationship between NO and leptin and IL-6 and leptin concentrations measured in**  
331 **Transwell inserts (a and b) and wells (c and d).** We observed a trend for a negative relationship  
332 between NO and leptin levels measured in Transwells (panel a;  $p=0.09$ , linear regression), and a  
333 significant negative relationship between these two molecules in wells (panel c;  $p=0.03$ , linear  
334 regression). There was no significant relationship between IL-6 and leptin levels in either  
335 Transwells (panel b) or wells (panel d).

336

## 337 Discussion

338 There were significant differences in amounts of NO and leptin measured in Transwells  
339 and wells. Higher NO levels were observed in cell-conditioned media collected from the  
340 macrophage-containing Transwells, while the cell-conditioned media collected from adipocyte-  
341 containing wells contained higher levels of leptin. This is logical, as macrophages are the major  
342 contributors to NO while adipocytes are the major contributors to leptin in the cell-conditioned  
343 media. The assay used to determine NO levels measures concentrations of nitrite ( $\text{NO}_2^-$ ), a  
344 small molecule (46 Da) that would be expected to travel through the pores of the Transwell  
345 membrane (0.4  $\mu\text{m}$  size). Diffusion of nitrite through the pores of the inserts would explain  
346 why there were quantifiable amounts of this molecule in the adipocyte-containing wells. Unno  
347 et al. (11) reported that 3T3-L1 adipocytes treated with an interferon ( $\text{IFN}$ )- $\gamma$  -LPS (10 ng/ml-5

348  $\mu\text{g/ml}$ ) mixture for 24 h had significantly increased expression of inducible nitric oxide synthase  
349 (iNOS) as well as of nitrite and nitrate released into culture medium, compared to untreated  
350 adipocytes. Dobashi et al. (25) treated differentiated 3T3-L1 adipocytes with 1  $\mu\text{g/ml}$  LPS for 48  
351 h and saw no significant increase in NO production by adipocytes compared to non-LPS treated  
352 cells, suggesting that IFN- $\gamma$  drives iNOS expression in 3T3-L1 cells to a larger extent than LPS.  
353 Our results support this idea, as in control experiments we did not observe a significant effect  
354 of LPS challenge on adipocyte-derived NO production (Figure 1b). Taking these results into  
355 account we hypothesize that in our co-incubation system the presence of NO in wells is due to  
356 diffusion of macrophage-derived NO from the Transwell inserts into the wells.

357         Despite the differences in NO measured between Transwells and wells, IL-6 levels in  
358 cell-conditioned media collected from these two compartments were similar. Adipocytes  
359 produce IL-6 under the action of LPS (26) but it is unlikely that the lack of difference in IL-6  
360 levels between the Transwells and wells is due to adipocyte-secreted IL-6, since the control  
361 experiments showed that LPS-challenged adipocytes produced about a sixth the amount of IL-6  
362 under the action of LPS compared to macrophages (RAW:  $1371.8 \pm 682.9$ ; 3T3:  $225.9 \pm 73.4$   
363  $\text{pg/ml}$ ; Figure 1b). We also suspect that LPS is not able to travel across the membrane of the  
364 Transwell insert, where it was added to the macrophages. Although the small size of the LPS  
365 molecule (4.3 kDa) means that it is possible for it to travel across the Transwell insert  
366 membrane, its heterogeneous nature can result in aggregates of varying sizes. These  
367 aggregates can range in size from 1000-4000 kDa (27), which would be too large to travel  
368 through the 0.4  $\mu\text{m}$  pore size of the membrane. It is more plausible that IL-6, with a 21 kDa  
369 size, is small enough to diffuse across the Transwell membrane which would allow for

370 equilibrium to be reached between the macrophage and adipocyte-containing compartments.  
371 The possibility that IL-6 production by macrophages could start leveling off before that of NO  
372 would explain the difference in NO levels observed between Transwells and wells, and the lack  
373 of difference observed for IL-6. We should consider that if LPS is traveling across the Transwell  
374 membrane it could be having a more pronounced effect on the co-incubated adipocytes than  
375 demonstrated in the control experiments that tested the effects of this endotoxin on the  
376 isolated cell lines. Yamashita et al. (28) found that IL-6 production was markedly up-regulated  
377 in adipocytes co-cultured with macrophages in the presence of LPS, compared to stimulating  
378 each cell line separately with the endotoxin. It is unlikely that in our system the IL-6 quantified  
379 in the wells is derived from the adipocytes, as levels of this adipokine are similar in cell-  
380 conditioned media from wells containing adipocytes co-incubated with macrophages in the  
381 presence of LPS (3T3+RAW+LPS) and wells containing adipocytes co-incubated with previously  
382 LPS-activated macrophages that were washed and resuspended in fresh medium (removing  
383 LPS) at the time of co-incubation (3T3+StimRAW).

384         The adipocyte-specific adipokine leptin was found in higher quantities in the wells,  
385 where the adipocytes resided. Temporal differences in expression of the leptin gene and  
386 production of the protein could explain the difference in Transwell vs well concentrations. The  
387 leptin molecule, at 16 kDa, is smaller than IL-6, which would allow it to travel across the  
388 Transwell membrane. If leptin secretion by the adipocytes is occurring 24 h post co-incubation,  
389 this would explain why levels of this adipokine are different between Transwells and wells  
390 during collection of cell-conditioned media. Our data show that there is basal leptin production  
391 by the adipocytes that is not dependent on LPS stimulation, as adipocytes exposed to the

392 control treatment secreted the same amount of this adipokine as adipocytes co-incubated with  
393 LPS. Previous reports have found that both physiological and pathological levels of leptin do  
394 not induce the expression of IL-6 in murine macrophages, but that it augments the effect of LPS  
395 in inducing IL-6 expression by priming macrophages to be more responsive to this endotoxin  
396 and that this synergistic effect is mediated by interleukin-receptor associated kinase (IRAK)-1  
397 (29). It is difficult to extrapolate these results to our own, since in our system we did not  
398 observe a difference in IL-6 levels between control experiments (macrophages activated with  
399 LPS) and macrophages in the co-incubation system which were activated with LPS and exposed  
400 to adipocyte-derived leptin. Furthermore, activation status of the macrophages did not affect  
401 leptin production although there appeared to be a weak relationship between leptin and NO  
402 levels, with leptin levels decreasing as NO levels increased. These results match what was  
403 observed by Unno et al. (11), who treated differentiated 3T3-L1 cells with an INF- $\gamma$ -LPS mixture  
404 and observed a significant induction of iNOS and decrease in leptin at both the protein and  
405 mRNA levels. We need to take into account that despite the observed significant relationship  
406 between these molecules, the low  $R^2$  values indicate that there are other factors influencing  
407 this relationship. Use of INF- $\gamma$ , in addition to LPS, in these co-incubation experiments could help  
408 clarify the relationship between leptin and NO in adipocytes. We also need to consider that the  
409 NO present in our system is mostly derived from macrophages, while in Unno's system NO was  
410 produced autocrinally by the adipocytes or due to the synergistic effect of LPS and INF- $\gamma$ . Nitric  
411 oxide might have differential autocrine and paracrine effects on leptin protein and gene  
412 expression in adipocytes. This is a question that warrants further investigation in order to

413 better understand the effects macrophage-derived NO could potentially have on mature  
414 adipocytes in this co-incubation system.

415 As a methodology, co-incubation of activated macrophages and fully differentiated  
416 adipocytes can help answer questions about macrophage-adipocyte interactions in AT and  
417 provide insights into how to blunt the inflammatory loop observed in obese AT. Research on  
418 this subject suggests that monocyte/macrophage recruitment into obese AT is an early  
419 contributor to this loop by virtue of macrophages having a bigger role in the secretion of  
420 inflammatory adipokines compared to adipocytes (3, 13). The polarization of macrophages  
421 toward the M1 phenotype as they arrive in obese AT is presumably directed by the  
422 microenvironment encountered by the macrophages, which is mostly set by the adipocytes  
423 residing in the tissue (3, 30, 12). We wanted to examine if activation of macrophages before or  
424 during plating affected secretion of inflammatory molecules, like NO and IL-6, by these cells and  
425 if activation status of the macrophages had an effect on production of the adipocyte-specific  
426 inflammatory adipokine leptin. Results from these experiments can help clarify the role of  
427 macrophage-derived adipokines on the initiation of the macrophage-adipocyte inflammatory  
428 loop observed in obese adipose tissue.

429 We did not observe significant difference in NO or IL-6 production from macrophages  
430 regardless of if LPS was added before plating or during plating onto Transwells. As expected,  
431 increased NO production by the macrophages, a sign of macrophage activation, was  
432 accompanied by increased production of IL-6. Release of IL-6 by macrophages suggests that  
433 these macrophages are taking on an M1 phenotype, which is expected during LPS activation  
434 (31). Although the three methodologies of macrophage activation tested did not result in

435 significant differences in NO and IL-6 production, it is important to note that at the time of cell-  
436 conditioned media collection, the media from macrophages plated in conditioned media  
437 (3T3+StimRAW+CondMed) contained secreted products for a 30 h time period while  
438 macrophages in fresh media (3T3+StimRAW) or with LPS added at time of plating  
439 (3T3+RAW+LPS) contained 24 h of secreted products (Figures 2 and 3). Levels of NO produced  
440 by activated macrophages plated in fresh media were similar to levels of NO produced by  
441 unstimulated macrophages suggesting that in this specific cell culture system these cells  
442 produced basal amounts of NO without LPS activation. This could be explained by activation of  
443 the macrophages as they are transferred from their original culture system (6-well plate) to the  
444 Transwells via the cell scraping method. On the other hand, quantified IL-6 levels were  
445 significantly higher in cell-conditioned media collected from activated macrophages plated in  
446 fresh media compared to unstimulated macrophages indicating that in this cell culture  
447 methodology challenging RAW 264.7 cells with LPS has a more pronounced and/or prolonged  
448 effect on production and release of IL-6 compared to NO.

449 In conclusion, the presence of LPS-stimulated macrophages in the co-incubation system  
450 did not affect leptin release by the mature adipocytes, as the adipocytes produced similar leptin  
451 levels when co-incubated with activated macrophages (3T3+RAW+LPS, 3T3+StimRAW,  
452 3T3+StimRAW+CondMed) as when co-incubated with unstimulated macrophages (3T3+RAW)  
453 (Figure 4). Our results also highlight the importance of sampling and analyzing the macrophage  
454 and adipocyte-containing microenvironments (Transwells and wells, respectively) separately in  
455 order to detect the subtle signaling dynamics that are important in the paracrine conversation  
456 occurring between these cell types. The methodologies presented here can be adopted for the

457 study of macrophage-adipocyte interactions, including cellular communication, chemotaxis  
458 studies, and effects of macrophage-derived molecules on adipocyte differentiation and  
459 mitochondrial function, among other research areas. Constant et al. (32) stated that the ERK  
460 1/2-driven antiadipogenic effect of macrophage cell-conditioned media on adipocytes occurred  
461 during the first 2 days of the 8-day adipocyte differentiation period. The co-incubation  
462 protocols we have developed can be modified to test cellular communication between these  
463 two cell types at different time points, allowing for further analyses of temporal interactions.  
464 Transwell inserts with larger pore sizes (3-5  $\mu\text{m}$ ) can be used for migration and chemotaxis  
465 studies that can help answer questions about macrophages recruitment into obese AT, which  
466 appears to be one of the early steps in setting up the macrophage-adipocyte inflammatory  
467 loop.

## 468 **Acknowledgements**

469 We are indebted to Dr. Andy McCall of Denison University's Biology Department for his help  
470 with the statistical analyses.

## 471 **Author Contributions**

472 Conceptualization: CCT

473 Data Curation: CCT & JB

474 Formal Analysis: CCT

475 Funding Acquisition: CCT & JB

476 Investigation: CCT & JB

477 Methodology: JB

478 Project Administration: CCT

479 Resources: CCT

480 Supervision: CCT

481 Visualization: CCT

482 Validation: CCT

483 Writing – original draft: CCT

484 Writing – review & editing: CCT

485



## 486 **References**

- 487
- 488 1. Ouchi N, Parker JL, Lugus JJ, Walsh K. Adipokines in inflammation and metabolic disease. *Nat*
- 489 *Rev Immunol*. 2011 Feb;11(2):85–97. <https://doi.org/10.1038/nri2921>.
- 490
- 491 2. Sorisky A, Molgat ASD, Gagnon A. Macrophage-Induced Adipose Tissue Dysfunction and the
- 492 Preadipocyte: Should I Stay (and Differentiate) or Should I Go? *Adv Nutr*. 2013 Jan
- 493 4;4(1):67–75. <https://doi.org/10.3945/an.112.003020>.
- 494
- 495 3. Fain JN. Release of Inflammatory Mediators by Human Adipose Tissue Is Enhanced in Obesity
- 496 and Primarily by the Nonfat Cells: A Review. *Mediators Inflamm* [Internet]. 2010 [cited 2021 Jun
- 497 9];2010. <https://doi.org/10.1155/2010/513948>.
- 498
- 499 4. van Dielen F, van't Veer C, Schols A, Soeters P, Buurman W, Greve J. Increased leptin
- 500 concentrations correlate with increased concentrations of inflammatory markers in morbidly
- 501 obese individuals. *Int J Obes*. 2001 Dec;25(12):1759–66. <https://doi.org/10.1038/sj.ijo.0801825>.
- 502
- 503 5. Friedman JM, Halaas JL. Leptin and the regulation of body weight in mammals. *Nature*. 1998
- 504 Oct;395(6704):763–70. <https://doi.org/10.1038/27376>.
- 505
- 506 6. Tartaglia LA, Dembski M, Weng X, Deng N, Culpepper J, Devos R, et al. Identification and
- 507 expression cloning of a leptin receptor, OB-R. *Cell*. 1995 Dec 29;83(7):1263–71.
- 508 [https://doi.org/10.1016/0092-8674\(95\)90151-5](https://doi.org/10.1016/0092-8674(95)90151-5).
- 509
- 510 7. Loffreda S, Yang SQ, Lin HZ, Karp CL, Brengman ML, Wang DJ, et al. Leptin regulates
- 511 proinflammatory immune responses. *The FASEB Journal*. 1998;12(1):57–65.
- 512 <https://doi.org/10.1096/fsb2fasebj.12.1.57>.
- 513
- 514 8. Mancuso P, Gottschalk A, Phare SM, Peters-Golden M, Lukacs NW, Huffnagle GB. Leptin-
- 515 Deficient Mice Exhibit Impaired Host Defense in Gram-Negative Pneumonia. *J Immunol*. 2002
- 516 Apr 15;168(8):4018–24. <https://doi.org/10.4049/jimmunol.168.8.4018>.
- 517
- 518 9. Santos-Alvarez, J, Goberna, R, Sánchez-Margalet V. Human leptin stimulates proliferation and
- 519 activation of human circulating monocytes. *Cell Immunol*. 1999 May 25;194(1):6-11.
- 520 <https://doi.org/10.1006/cimm.1999.1490>.
- 521
- 522 10. Acedo SC, Gambero S, Cunha FGP, Lorand-Metze I, Gambero A. Participation of leptin in the
- 523 determination of the macrophage phenotype: an additional role in adipocyte and macrophage
- 524 crosstalk. *In Vitro CellDevBiol-Animal*. 2013 Jun;49(6):473–8. [https://doi.org/10.1007/s11626-](https://doi.org/10.1007/s11626-013-9629-x)
- 525 [013-9629-x](https://doi.org/10.1007/s11626-013-9629-x).
- 526
- 527 11. Unno Y, Akuta T, Sakamoto Y, Horiuchi S, Akaike T. Nitric oxide-induced downregulation of
- 528 leptin production by 3T3-L1 adipocytes. *Nitric Oxide*. 2006 Sep 1;15(2):125–32.
- 529 <https://doi.org/10.1016/j.niox.2005.12.002>.

- 530
- 531 12. Makki K, Froguel P, Wolowczuk I. Adipose Tissue in Obesity-Related Inflammation and  
532 Insulin Resistance: Cells, Cytokines, and Chemokines. *ISRN Inflamm* [Internet]. 2013 Dec 22  
533 [cited 2021 Jun 9];2013. <https://doi.org/10.1155/2013/139239>.
- 534
- 535 13. Bai Y, Sun Q. Macrophage recruitment in obese adipose tissue. *Obes Rev*. 2015  
536 Feb;16(2):127–36. <https://doi.org/10.1111/obr.12242>.
- 537
- 538 14. Osborn O, Olefsky JM. The cellular and signaling networks linking the immune system and  
539 metabolism in disease. *Nat Med*. 2012 Mar;18(3):363–74. <https://doi.org/10.1038/nm.2627>.
- 540
- 541 15. Boutens L, Stienstra R. Adipose tissue macrophages: going off track during obesity.  
542 *Diabetologia*. 2016;59:879–94. <https://doi.org/10.1007/s00125-016-3904-9>.
- 543
- 544 16. Lumeng CN, Bodzin JL, Saltiel AR. Obesity induces a phenotypic switch in adipose tissue  
545 macrophage polarization. *J Clin Invest*. 2007 Jan 2;117(1):175–84.  
546 <https://doi.org/10.1172/JCI29881>.
- 547
- 548 17. Yamashita A, Soga Y, Iwamoto Y, Asano T, Li Y, Abiko Y, et al. DNA microarray analyses of  
549 genes expressed differentially in 3T3-L1 adipocytes co-cultured with murine macrophage cell  
550 line RAW264.7 in the presence of the toll-like receptor 4 ligand bacterial endotoxin. *Int J Obes*.  
551 2008 Nov;32(11):1725–9. <https://doi.org/10.1038/ijo.2008.153>.
- 552
- 553 18. Blüher M. The distinction of metabolically ‘healthy’ from ‘unhealthy’ obese individuals.  
554 *Current Opinion in Lipidology*. 2010 Feb;21(1):38–43.  
555 <https://doi.org/10.1097/MOL.0b013e3283346ccc>.
- 556
- 557 19. Arner E, Mejhert N, Kulyté A, Balwierz PJ, Pachkov M, Cormont M, et al. Adipose Tissue  
558 MicroRNAs as Regulators of CCL2 Production in Human Obesity. *Diabetes*. 2012 Aug  
559 1;61(8):1986–93. <https://doi.org/10.2337/db11-1508>.
- 560
- 561 20. Kitade H, Sawamoto K, Nagashimada M, Inoue H, Yamamoto Y, Sai Y, et al. CCR5 Plays a  
562 Critical Role in Obesity-Induced Adipose Tissue Inflammation and Insulin Resistance by  
563 Regulating Both Macrophage Recruitment and M1/M2 Status. *Diabetes*. 2012 Jul 1;61(7):1680–  
564 90. <https://doi.org/10.2337/db11-1506>.
- 565
- 566 21. Patel P, Abate N. Body Fat Distribution and Insulin Resistance. *Nutrients*. 2013 Jun  
567 5;5(6):2019–27. <https://doi.org/10.3390/nu5062019>.
- 568
- 569 22. Heilbronn LK, Rood J, Janderova L, Albu JB, Kelley DE, Ravussin E, et al. Relationship  
570 between Serum Resistin Concentrations and Insulin Resistance in Nonobese, Obese, and Obese  
571 Diabetic Subjects. *The Journal of Clinical Endocrinology & Metabolism*. 2004 Apr 1;89(4):1844–  
572 8. <https://doi.org/10.1210/jc.2003-031410>.
- 573

- 574 23. Vieira-Potter VJ. Inflammation and macrophage modulation in adipose tissues. *Cellular*  
575 *Microbiology*. 2014;16(10):1484–92. <https://doi.org/10.1111/cmi.12336>.  
576
- 577 24. Zebisch K, Voigt V, Wabitsch M, Brandsch M. Protocol for effective differentiation of 3T3-L1  
578 cells to adipocytes. *Analytical Biochemistry*. 2012 Jun 1;425(1):88–90.  
579 <https://doi.org/10.1016/j.ab.2012.03.005>.  
580
- 581 25. Dobashi, K., et al. “Troglitazone Inhibits the Expression of Inducible Nitric Oxide Synthase in  
582 Adipocytes in Vitro and in Vivo Study in 3T3-L1 Cells and Otsuka Long-Evans Tokushima Fatty  
583 Rats.” *Life Sciences*, vol. 67, no. 17, Sept. 2000, pp. 2093–101.  
584 [https://doi.org/10.1016/s0024-3205\(00\)00796-7](https://doi.org/10.1016/s0024-3205(00)00796-7).  
585
- 586 26. Chirumbolo S, Franceschetti G, Zoico E, Bambace C, Cominacini L, Zamboni M. LPS response  
587 pattern of inflammatory adipokines in an in vitro 3T3-L1 murine adipocyte model. *Inflamm Res*.  
588 2014 Jun 1;63(6):495–507. <https://doi.org/10.1007/s00011-014-0721-9>.  
589
- 590 27. Jann B, Reske K, Jann K. Heterogeneity of Lipopolysaccharides. Analysis of Polysaccharide  
591 Chain Lengths by Sodium Dodecylsulfate-Polyacrylamide Gel Electrophoresis. *European Journal*  
592 *of Biochemistry*. 1975;60(1):239–46. <https://doi.org/10.1111/j.1432-1033.1975.tb20996.x>.  
593
- 594 28. Yamashita A, Soga Y, Iwamoto Y, Yoshizawa S, Iwata H, Koikeguchi S, et al. Macrophage-  
595 Adipocyte Interaction: Marked Interleukin-6 Production by Lipopolysaccharide. *Obesity*.  
596 2007;15(11):2549–52. <https://doi.org/10.1038/oby.2007.305>.  
597
- 598 29. Vaughan T, Li L. Molecular mechanism underlying the inflammatory complication of leptin in  
599 macrophages. *Molecular Immunology*. 2010 Sep 1;47(15):2515–8.  
600 <https://doi.org/10.1016/j.molimm.2010.06.006>.  
601
- 602 30. Olefsky JM, Glass CK. Macrophages, Inflammation, and Insulin Resistance. *Annual Review of*  
603 *Physiology*. 2010;72(1):219–46. <https://doi.org/10.1146/annurev-physiol-021909-135846>.  
604
- 605 31. Orecchioni M, Ghosheh Y, Pramod AB, Ley K. Macrophage Polarization: Different Gene  
606 Signatures in M1(LPS+) vs. Classically and M2(LPS-) vs. Alternatively Activated Macrophages.  
607 *Front Immunol*. 2019 May 24 [cited 2021 Jun 9];10.<https://doi.org/10.3389/fimmu.2019.01084>.  
608
- 609 32. Constant VA, Gagnon A, Yarmo M, Sorisky A. The antiadipogenic effect of macrophage-  
610 conditioned medium depends on ERK1/2 activation. *Metabolism*. 2008 Apr 1;57(4):465–72.  
611 <http://dx.doi.org/10.1016/j.metabol.2007.11.005>  
612

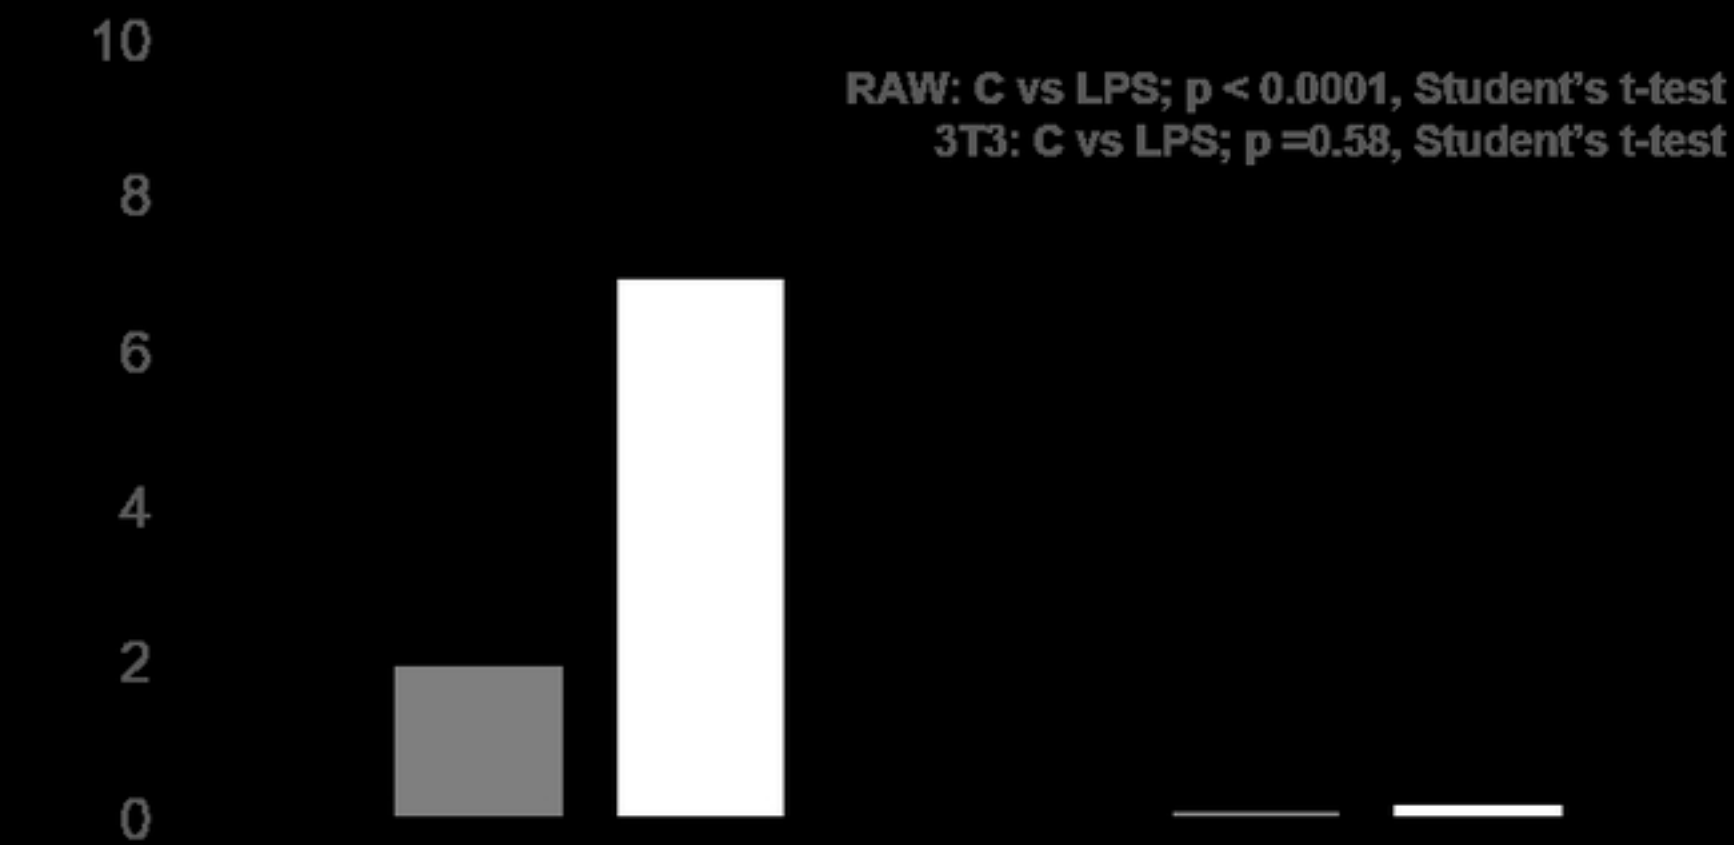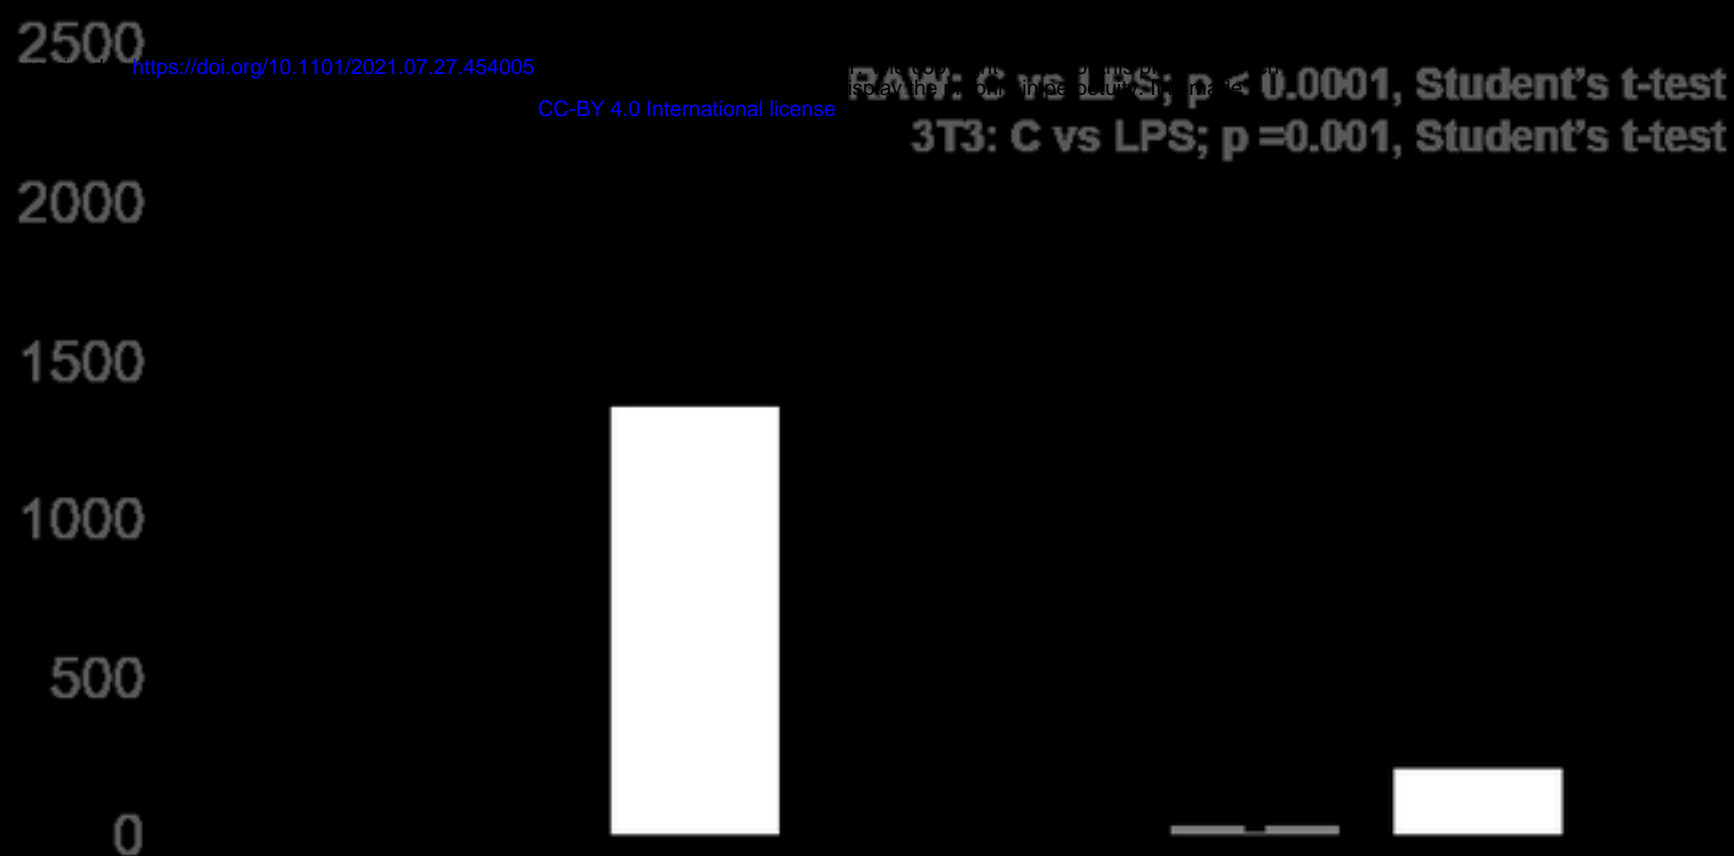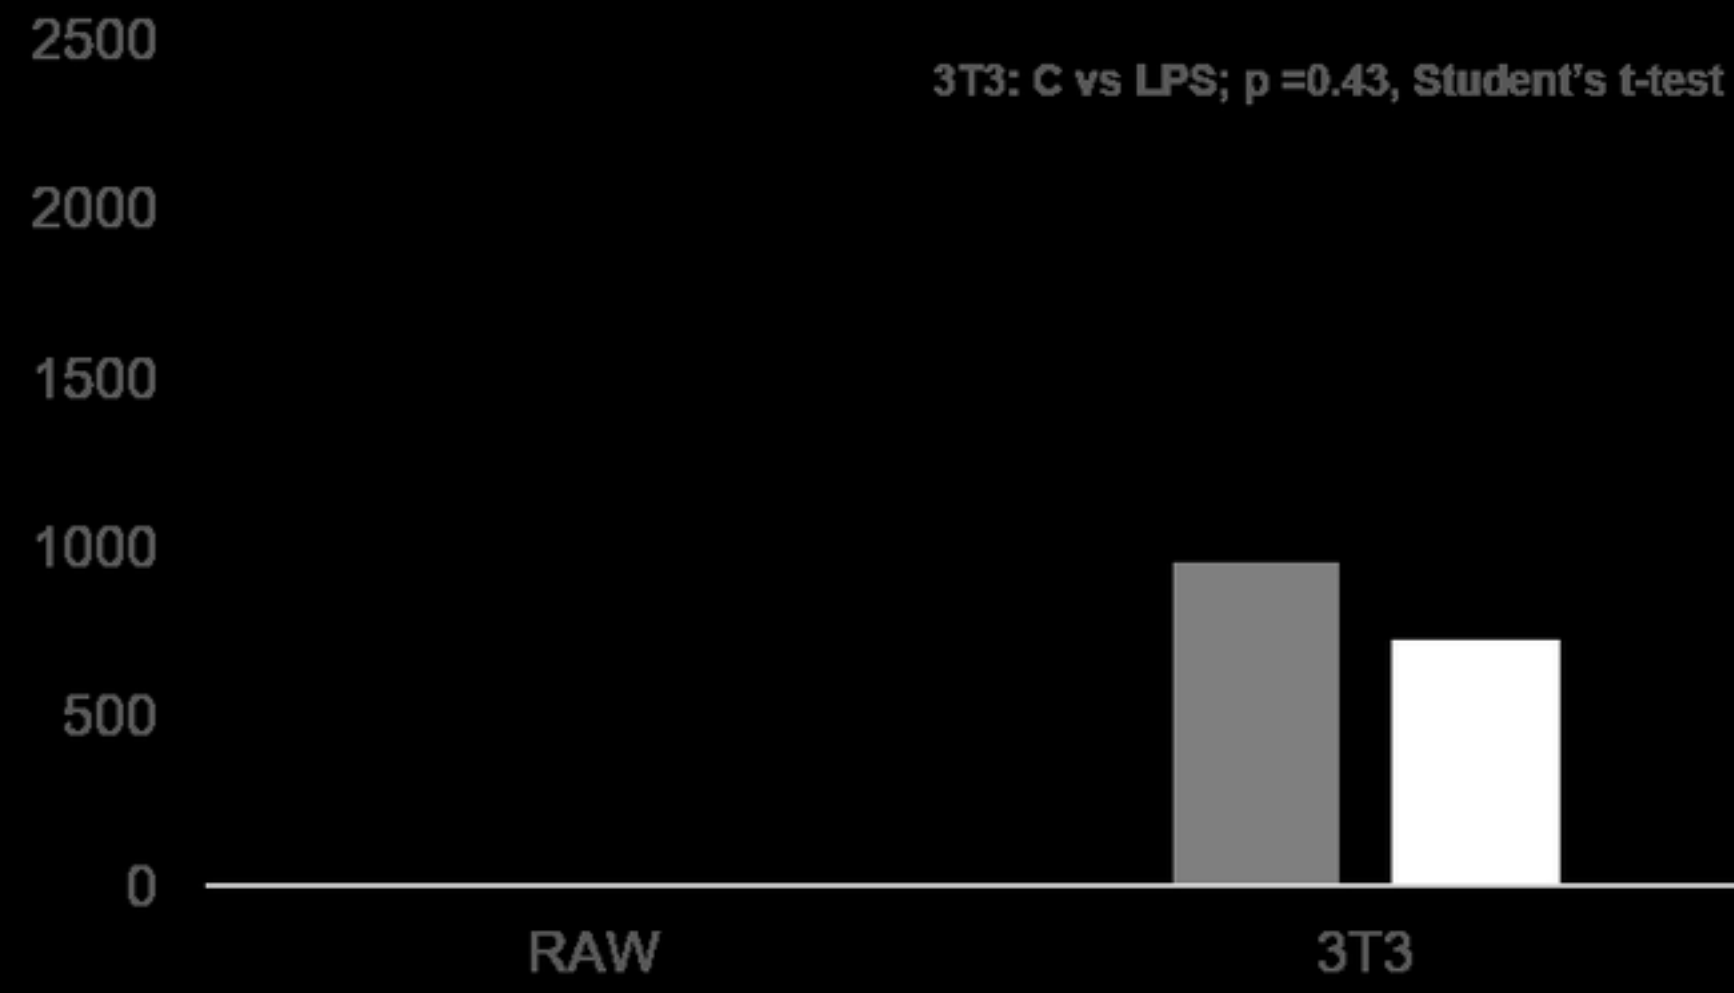

Fig 1

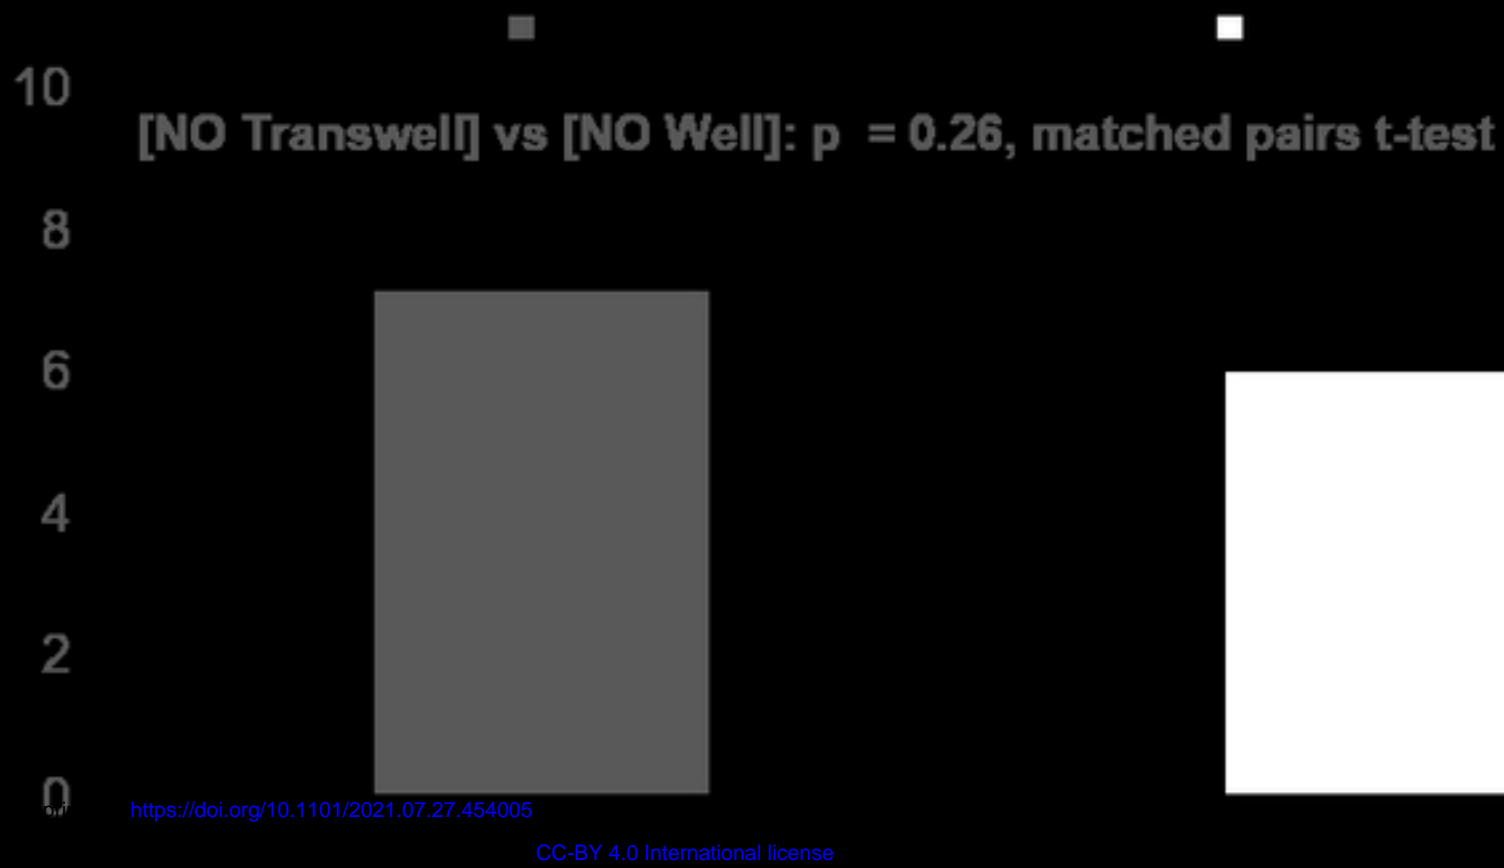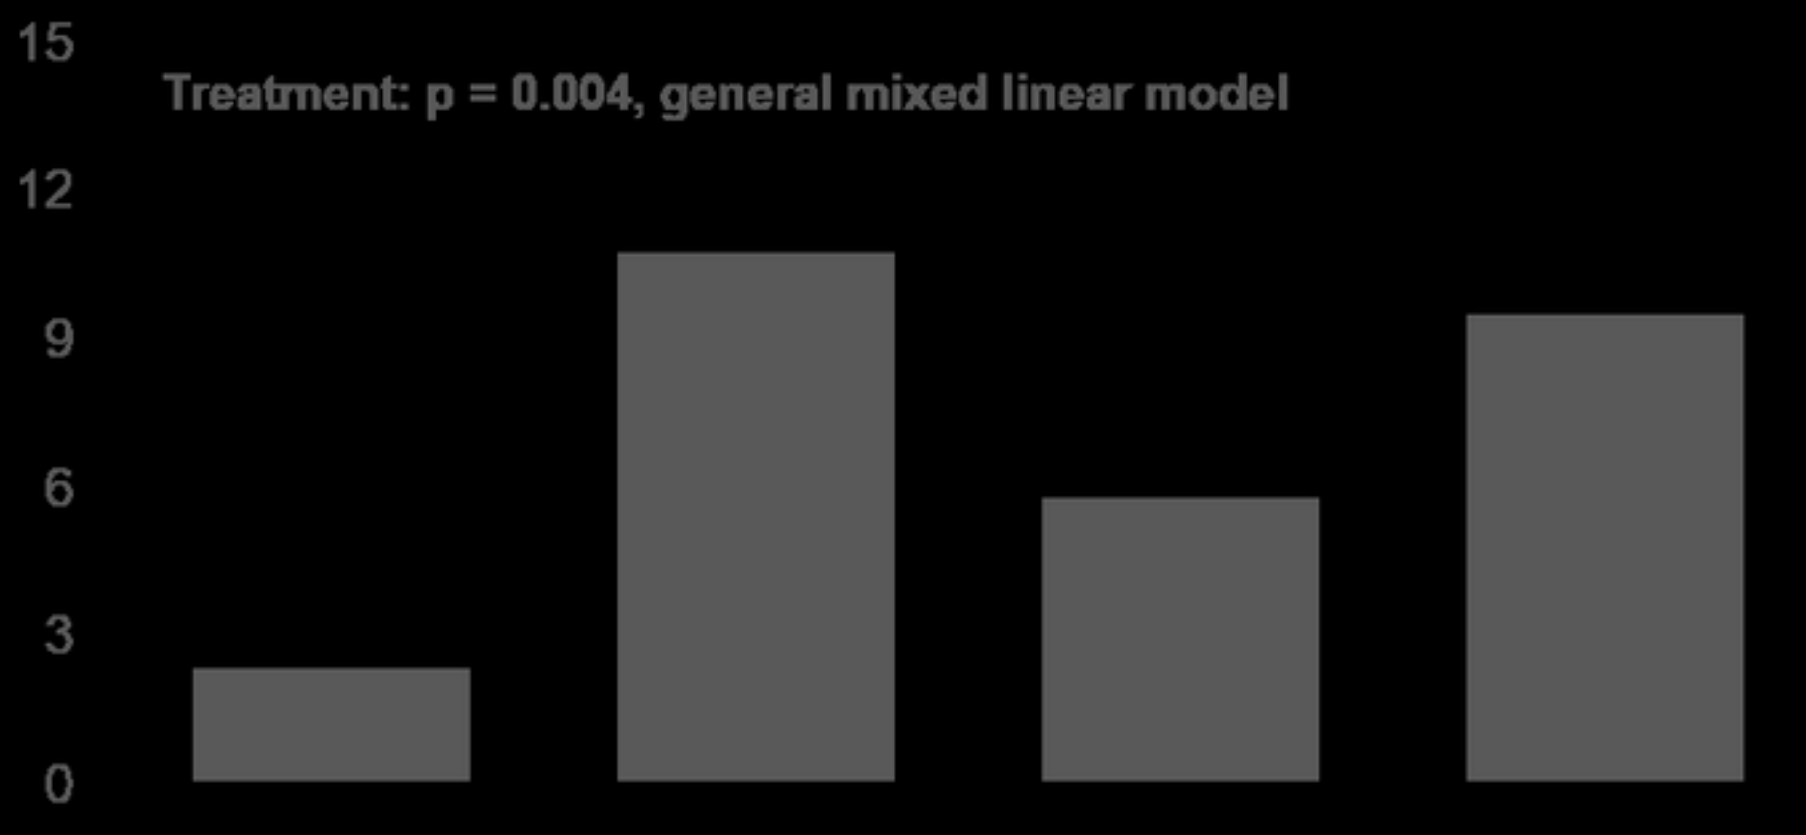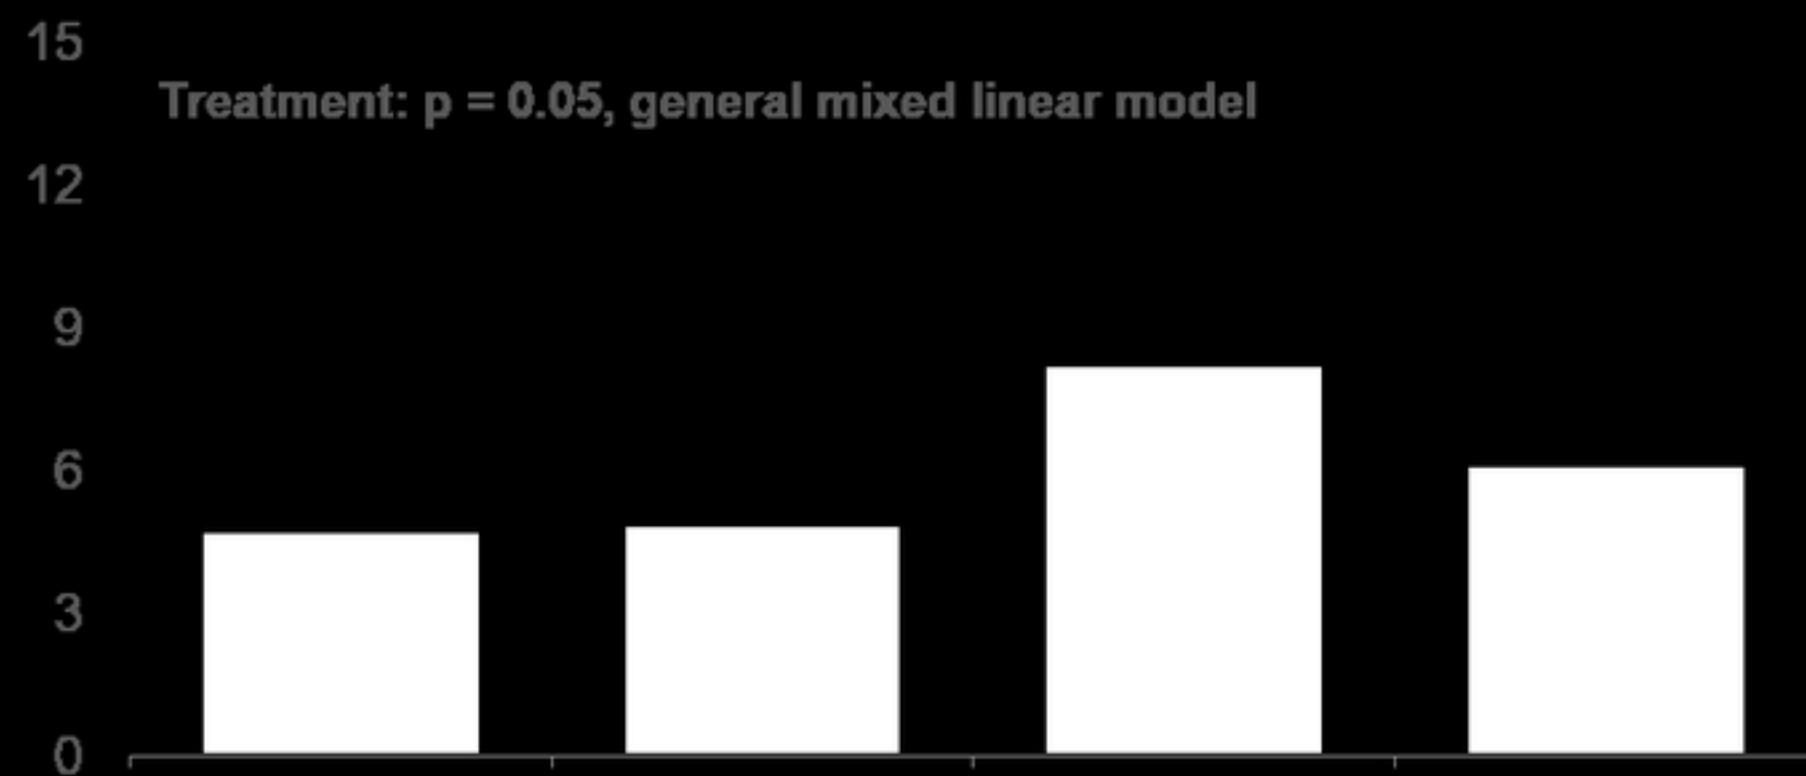

Fig 2

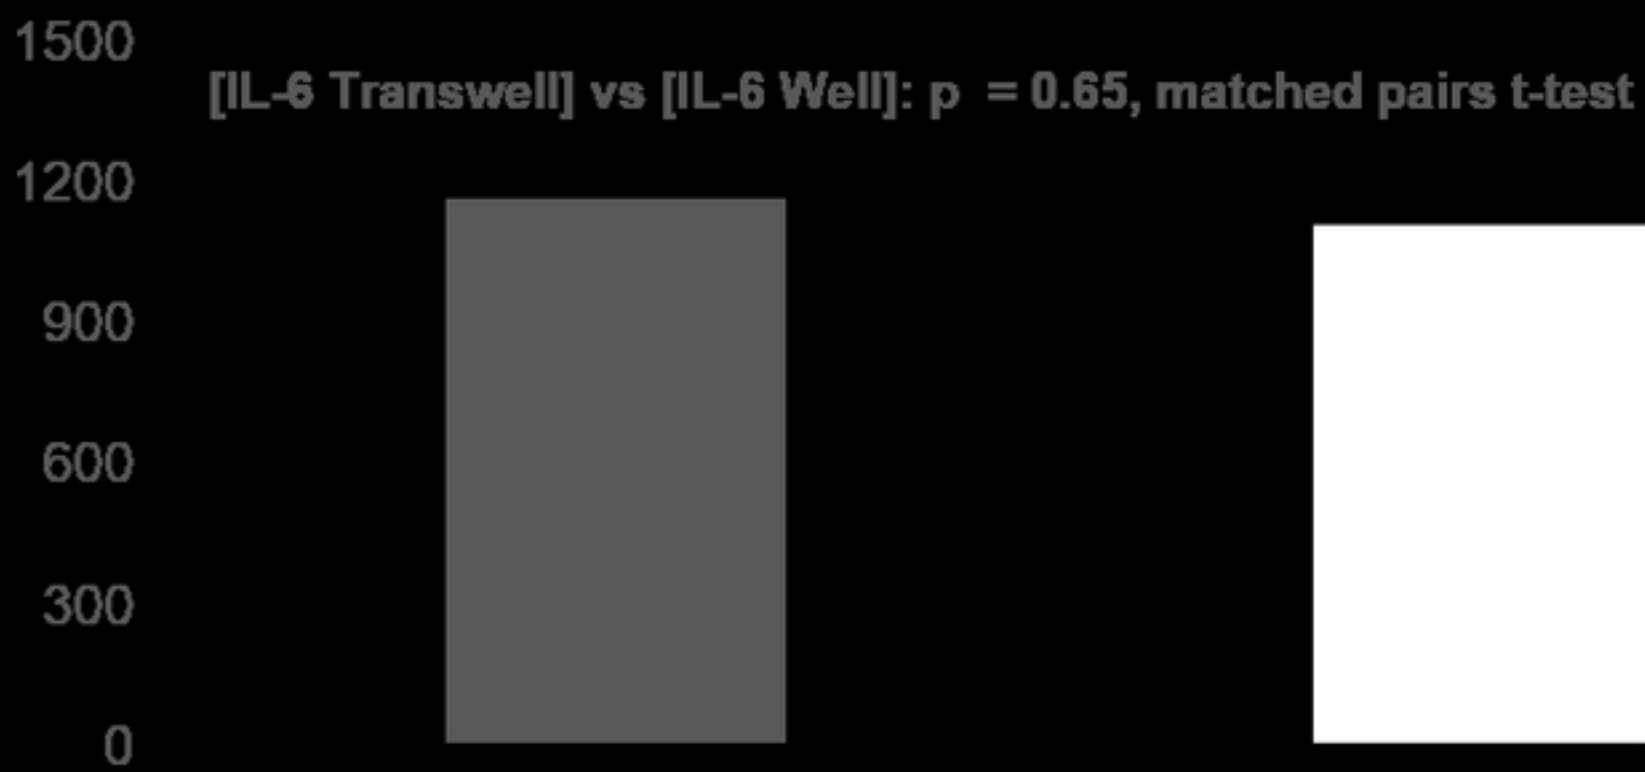

<https://doi.org/10.1101/2021.07.27.454005>  
Treatment:  $p = 0.003$ , general mixed linear model

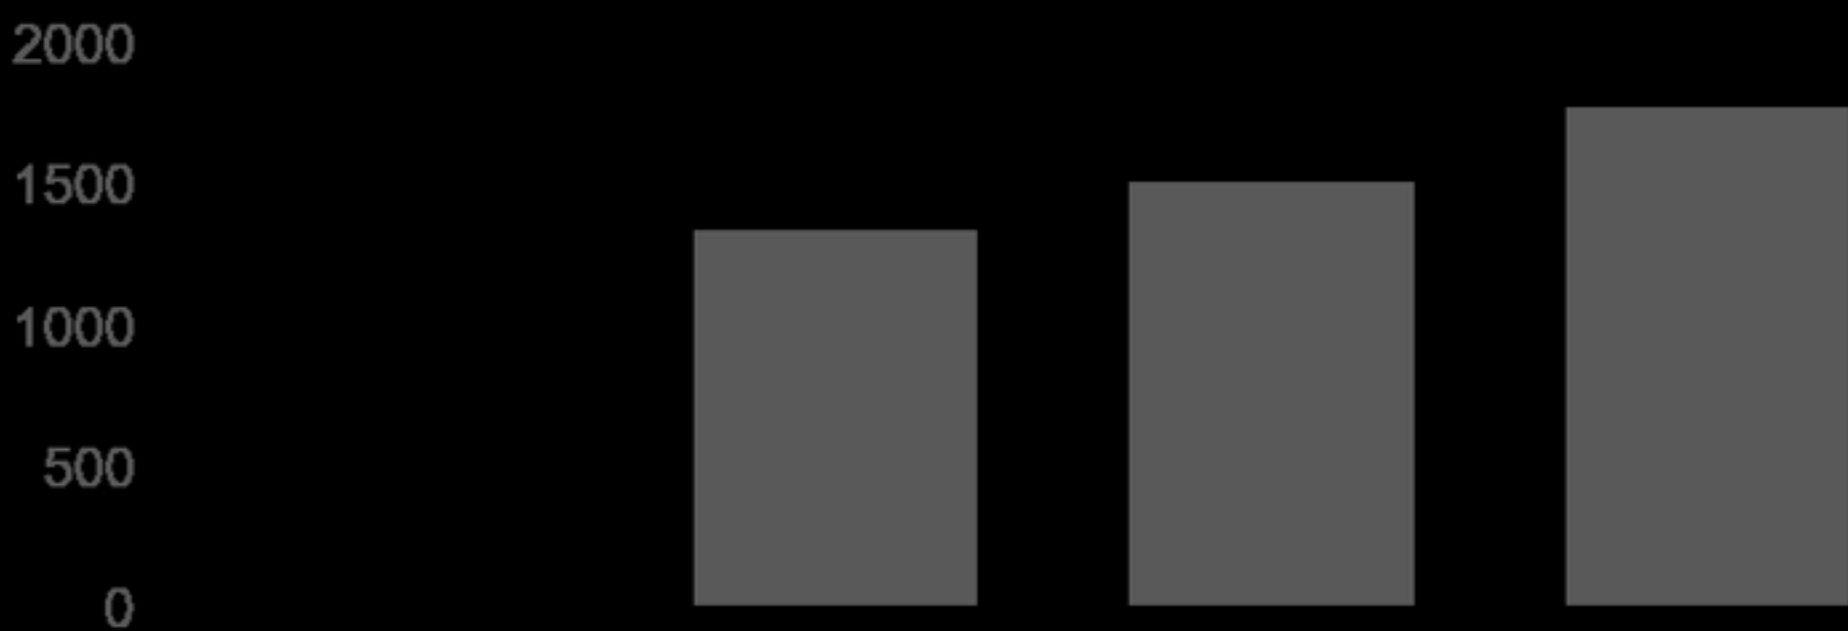

Treatment:  $p < 0.001$ , general mixed linear model

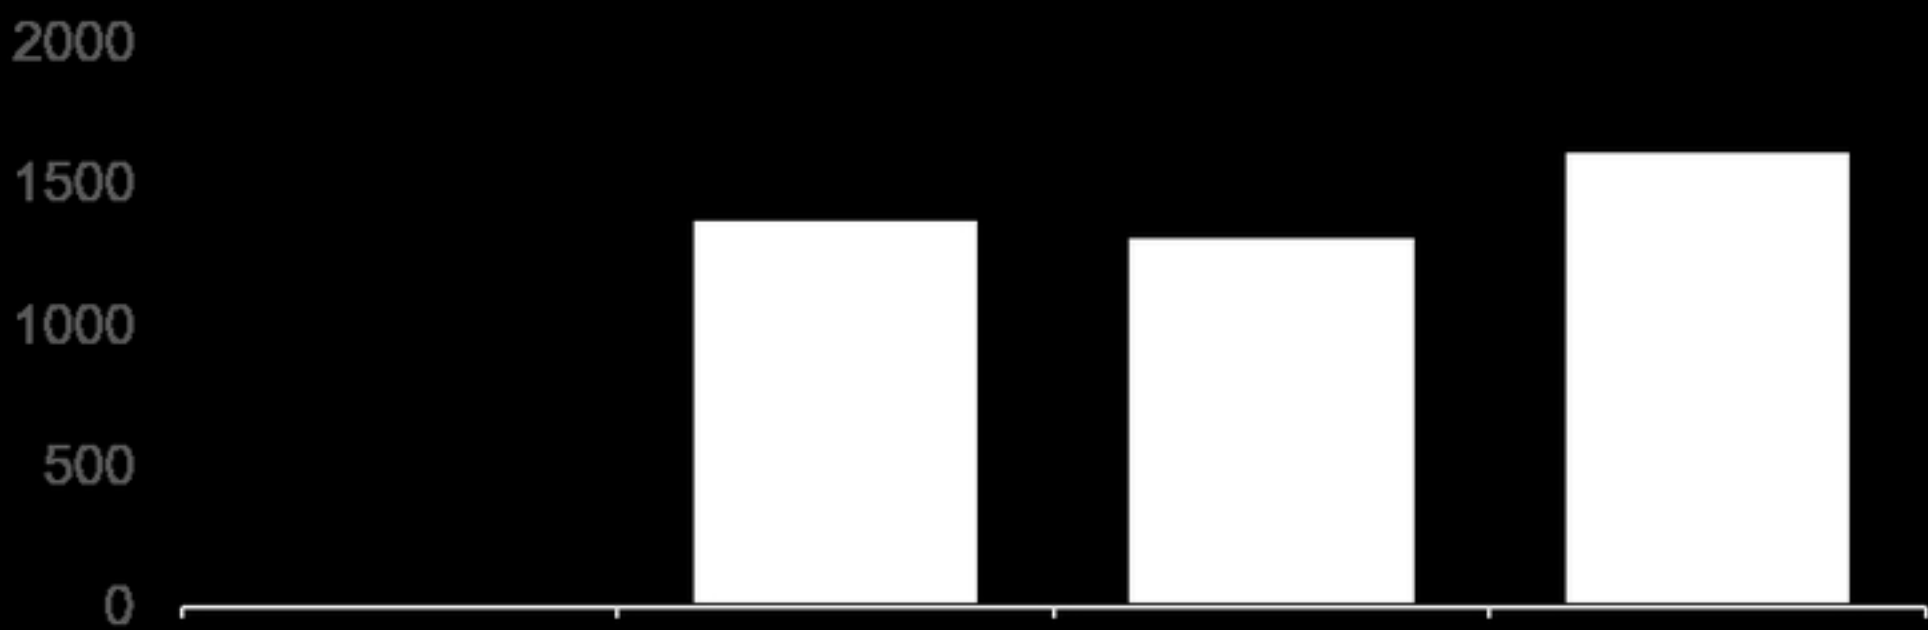

Fig 3

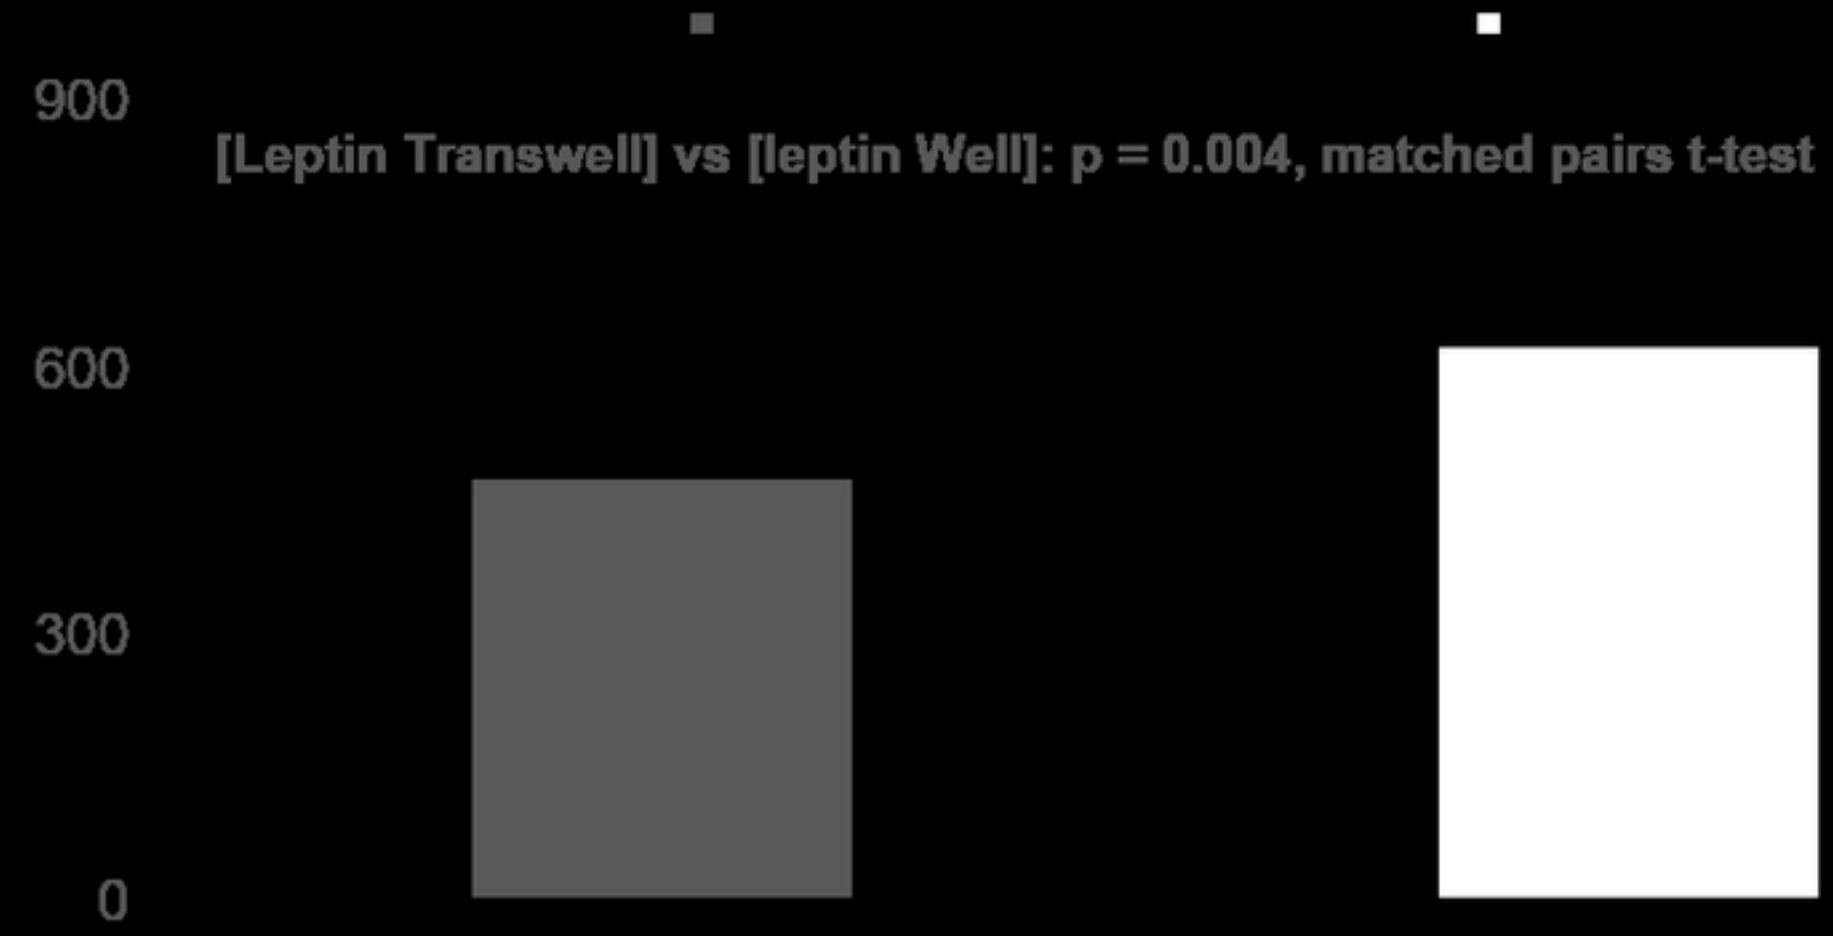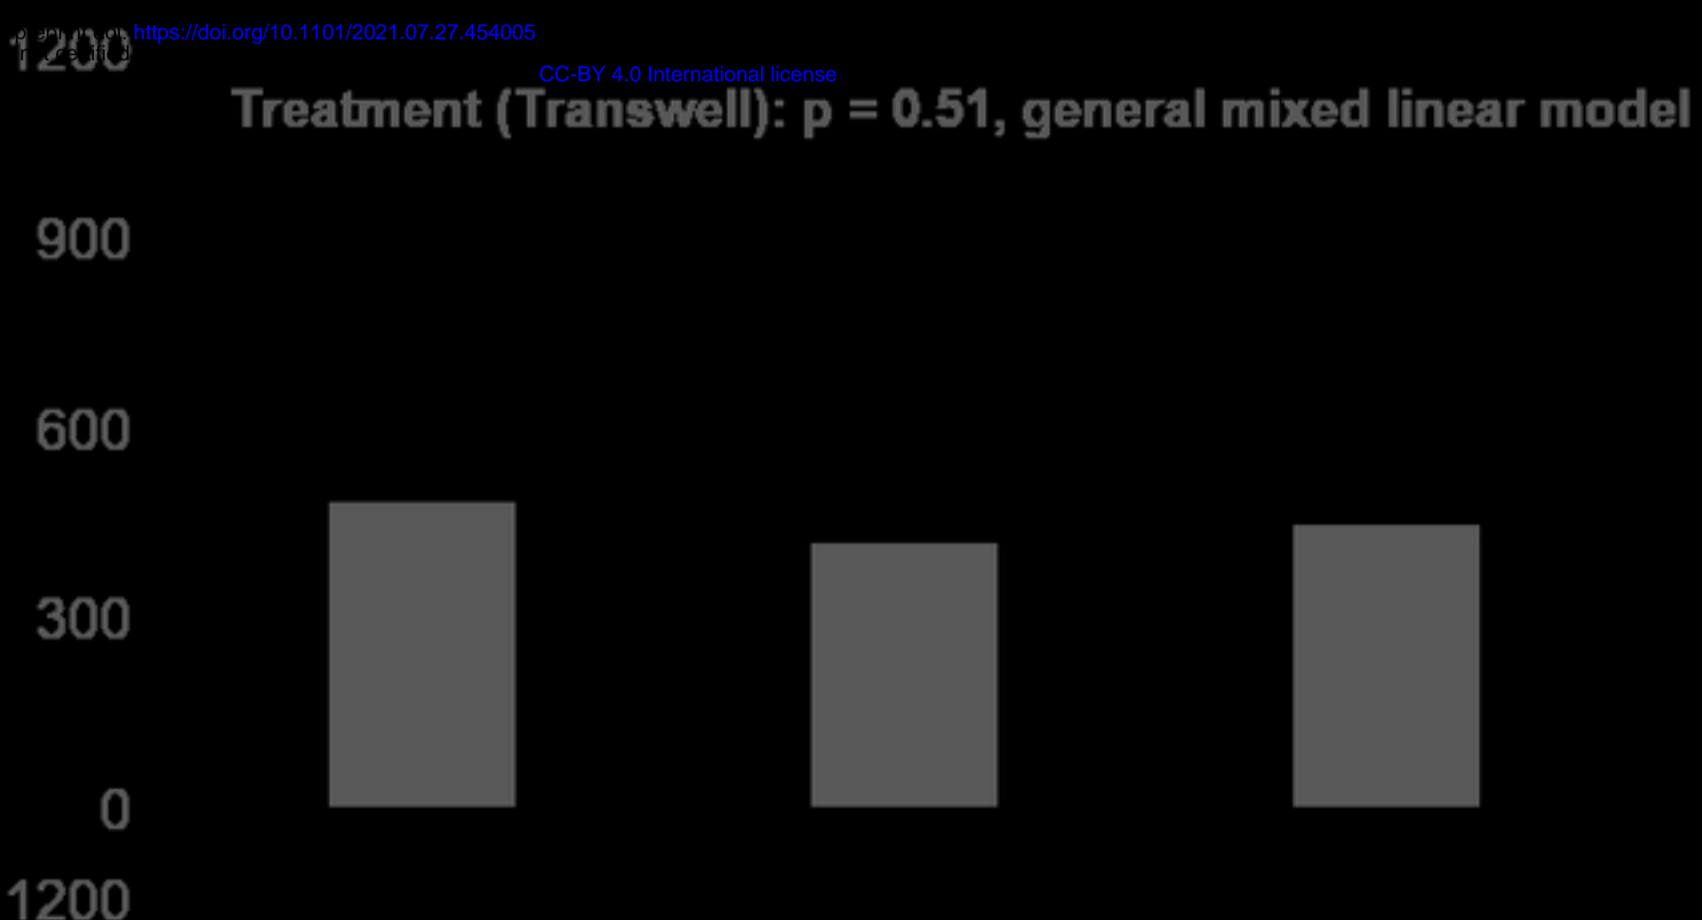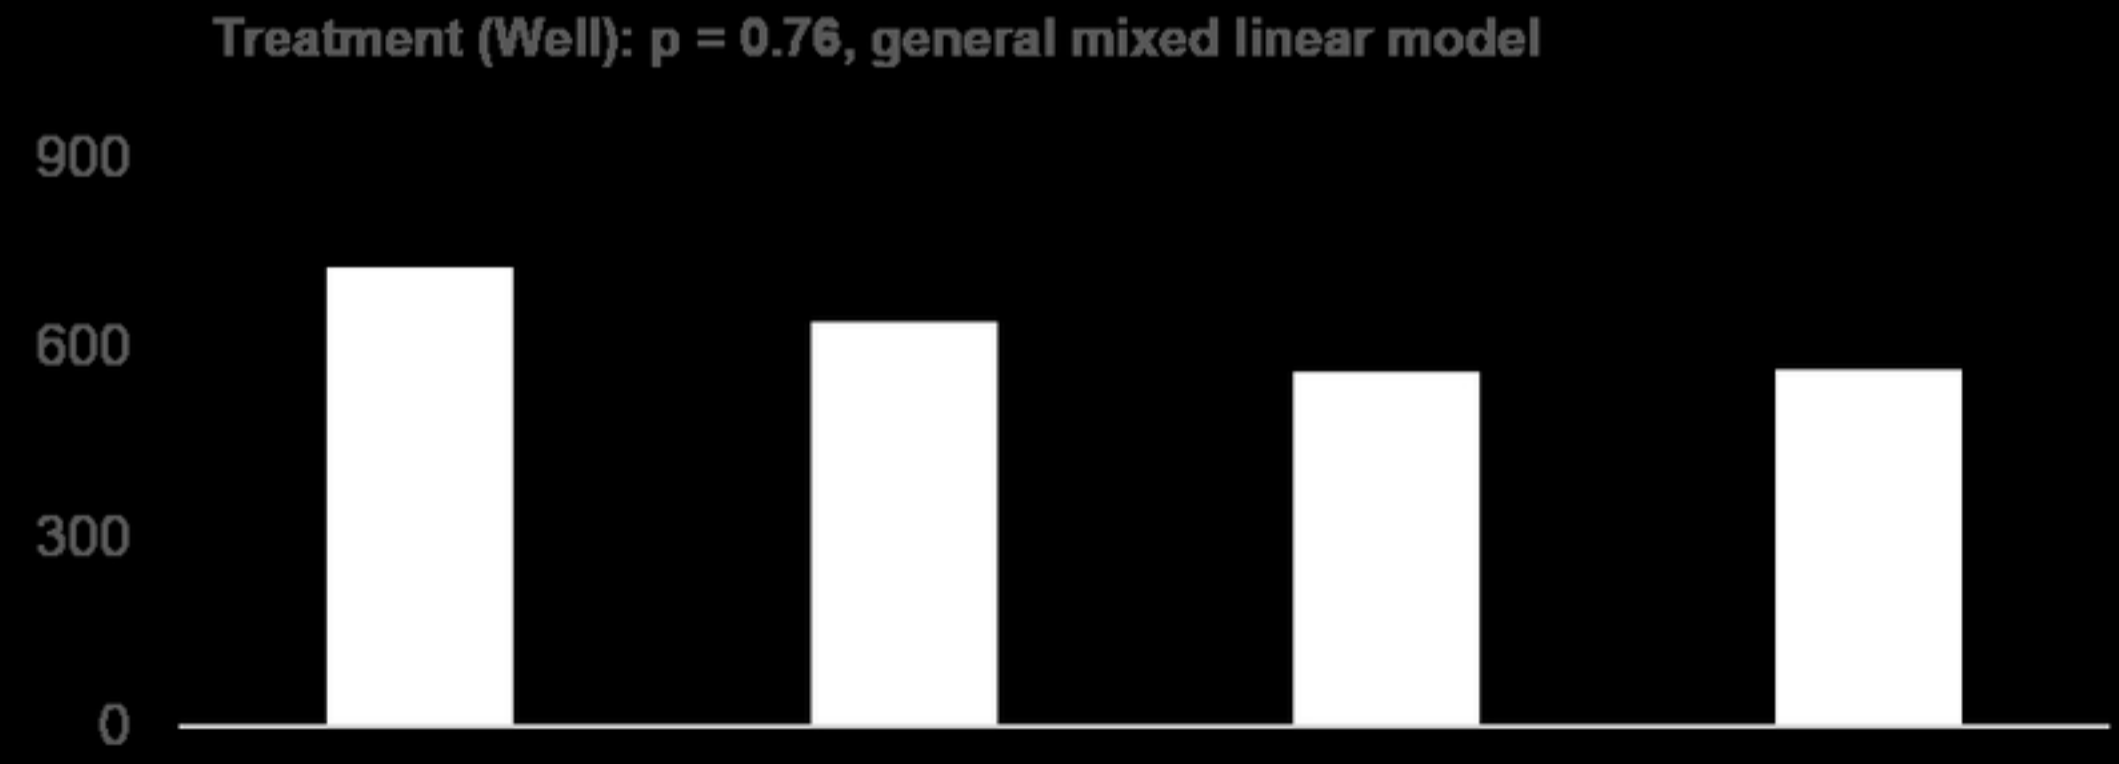

Fig 4

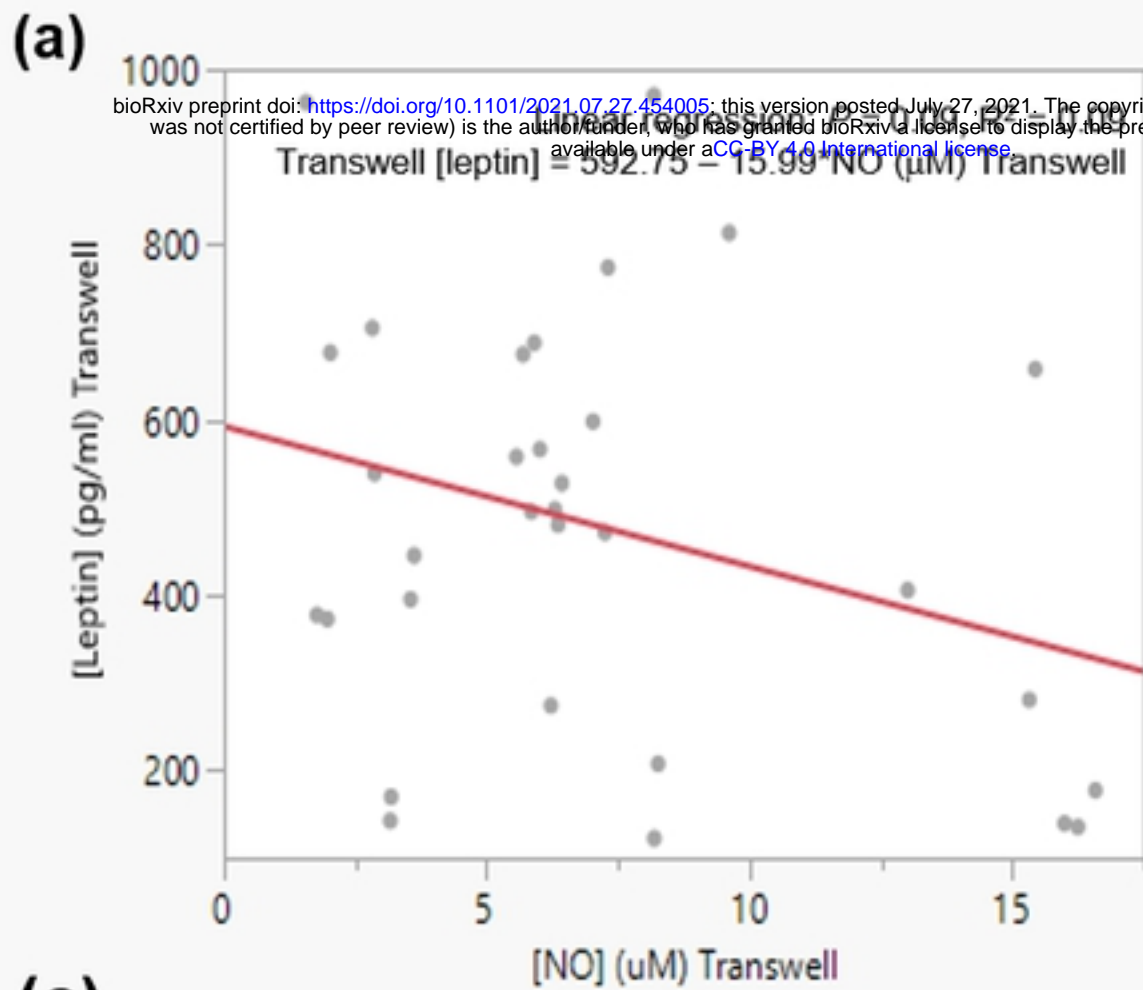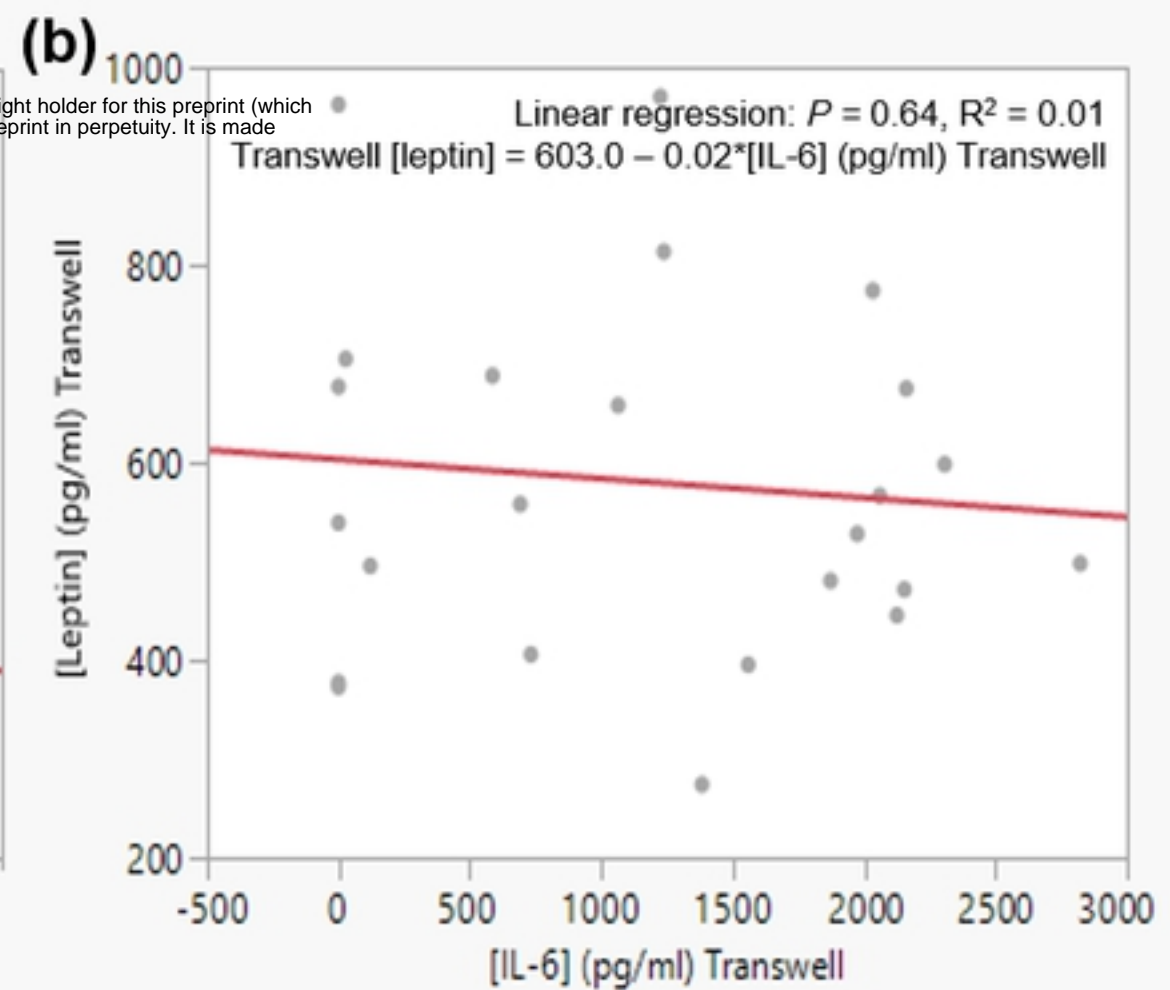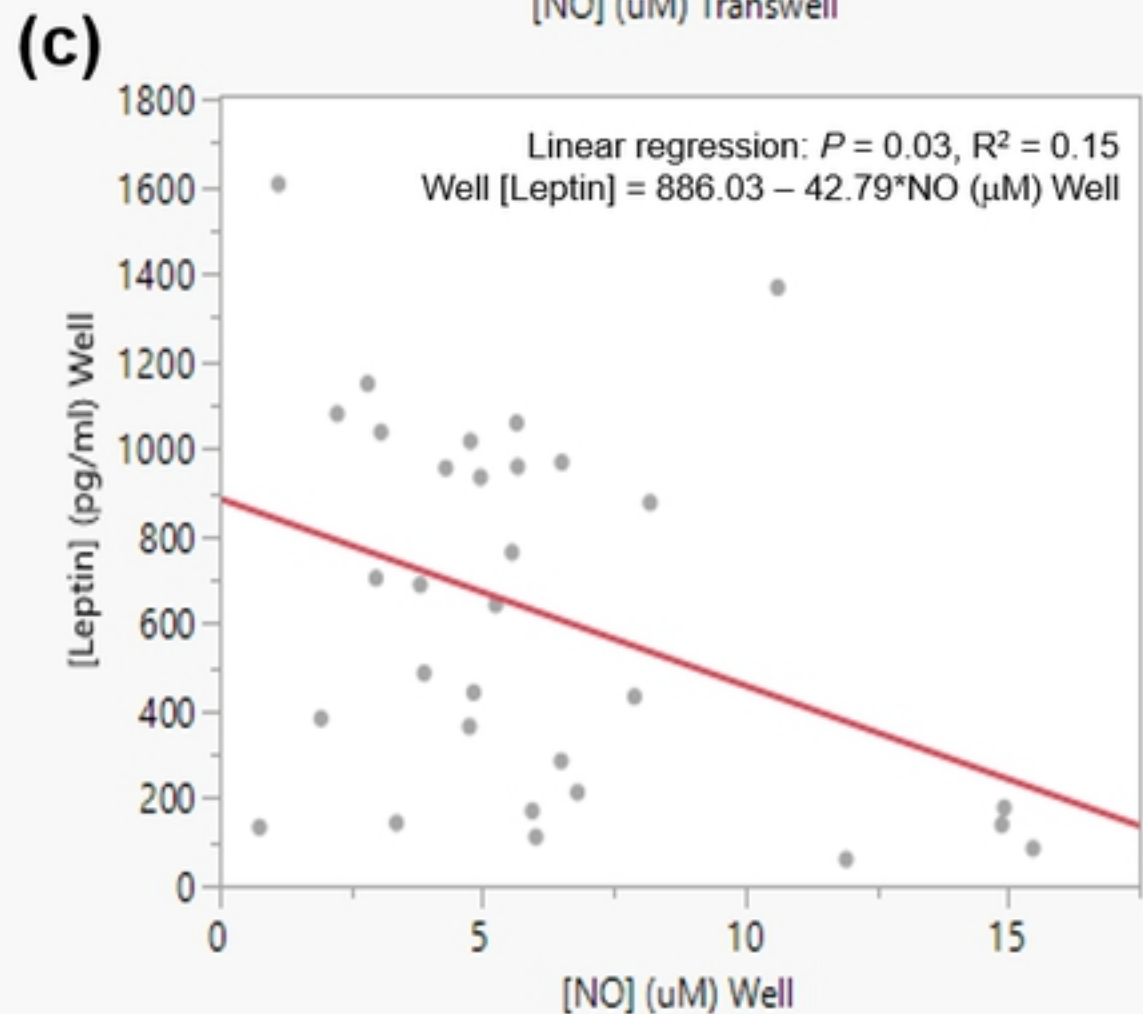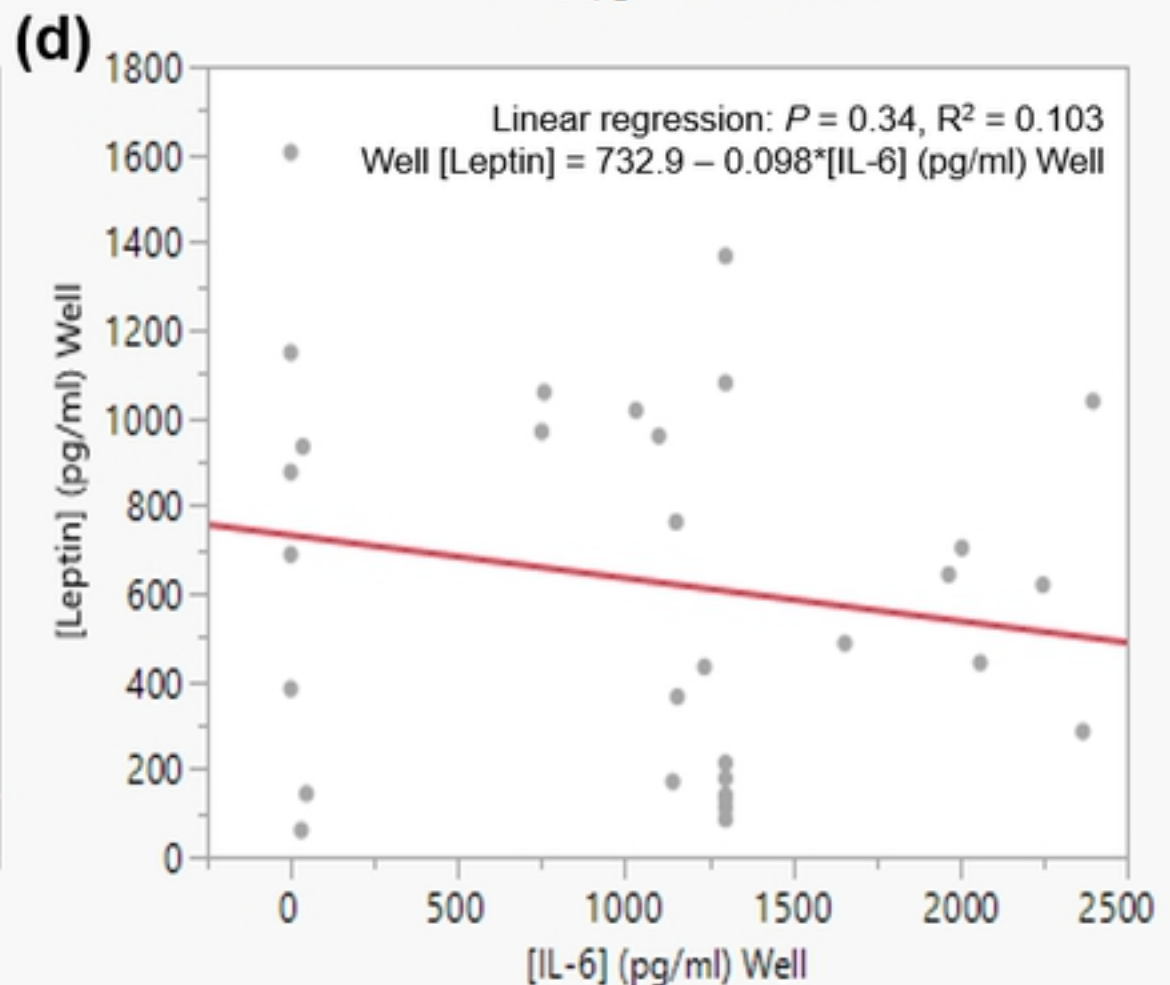

Fig 5
